# Supplementary material for: Mechanistic investigation of zinc-promoted silylation of phenylacetylene and chlorosilane: a combined experimental and computational study
Source: Royal Society of Chemistry journal article supplement (doi:10.1039/d0cp04127k), 2020-01-01
Supplement: d0cp04127k1.pdf [file d0cp04127k1.pdf]

## Table of Contents

|                                                                                      |    |
|--------------------------------------------------------------------------------------|----|
| 1. Experimental Section .....                                                        | 2  |
| 2. Characterization Methods .....                                                    | 2  |
| 3. Experimental results .....                                                        | 2  |
| 3.1. Procedure for testing reaction time under different reaction temperatures ..... | 2  |
| 3.2. Procedure for time course reaction monitored by GC analysis.....                | 3  |
| 3.3. Procedure for deuterated experiment .....                                       | 3  |
| 3.4. Procedure for acquisition of EPR spectra .....                                  | 4  |
| 4. Benchmarking .....                                                                | 4  |
| 4.1. K-point mesh.....                                                               | 4  |
| 4.2. Cut-off energy .....                                                            | 5  |
| 4.3. Smearing .....                                                                  | 6  |
| 5. Supplemental data .....                                                           | 6  |
| 5.1. Adsorption modes and sites .....                                                | 6  |
| 5.2. Mechanism of the initiation stage .....                                         | 7  |
| 5.3. Product formation pathways.....                                                 | 10 |
| 5.4. Bader charge analysis for the surface adsorbed species .....                    | 10 |
| 6. Structure data .....                                                              | 12 |

## 1. Experimental Section

A vacuum glass Schlenk tube (25 mL) equipped with a magnetic stirring bar was evacuated and flushed with argon. The calculated amount of zinc powder and 10 mL of deoxidized acetonitrile were placed in the reactor. Then to the mixture obtained were successively added phenylacetylene and  $\text{Me}_3\text{SiCl}$  under a flow of argon. The reactor was placed in an oil bath, and the reaction was conducted at 100 °C. All manipulations with air-sensitive materials were performed with the exclusion of oxygen and moisture using Schlenk techniques or a glovebox. Acetonitrile solvent was distilled under  $\text{N}_2$  from  $\text{CaH}_2$ . Nitrogen was purified by passage through a Ag oxygen-removal column and a Davison 4 Å molecular sieve column. Phenylacetylene,  $\text{Me}_3\text{SiCl}$ , Styrene, 1-Phenyl-2-trimethylsilylacetylene, TEMPO and Toluene were purchased from TCI and the radical scavenger N-tert-Butyl- $\alpha$ -phenylnitron (PBN) from Sigma-Aldrich. All reagents were used as received without further purification.

## 2. Characterization Methods

The  $^1\text{H}$  (400MHz) and  $^{13}\text{C}$  (100MHz) NMR spectra was recorded in  $\text{CDCl}_3$  using a Bruker AVANCE III 400 MHz spectrometer and referenced to the residual protonated solvent peaks ( $^1\text{H}$   $\delta$  7.26 ppm and  $^{13}\text{C}$   $\delta$  77.16 ppm for  $\text{CDCl}_3$ ). The EPR spectra was recorded on a Bruker BioSpin GmbH X-band ( $\nu = 9.87$  GHz) digital EPR spectrometer. All EPR spectra were recorded at a microwave power of 1-10 mW and 100 kHz magnetic field modulation of 1.0 G amplitude. The GC analysis was performed on gas chromatography apparatus equipped with a FID detector and capillary column HP-5 (30 m  $\times$  0.32 mm). Products were identified by GC/MS equipped with a HP-5 column (30 m  $\times$  0.25 mm) and ion trap mass detector. The conversion yields were calculated using the internal standard calculation method with toluene as an internal standard.

## 3. Experimental results

### 3.1. Procedure for testing reaction time under different reaction temperatures

To a 25 mL Schlenk flask zinc powder (9 mmol), phenylacetylene (3 mmol),  $\text{Me}_3\text{SiCl}$  (3 mmol) and dry acetonitrile (10 mL) was added and the mixture was stirred at different reaction temperatures monitored by GC with FID detector. The yields were calculated using area normalization method.

Table S1. Time required to complete reaction under different temperatures

| Entry | Temperature (°C) | Time for yield over 98% (h) |
|-------|------------------|-----------------------------|
| 1     | 80               | 20                          |
| 2     | 100              | 12                          |
| 3     | 120              | 10                          |

### 3.2. Procedure for time course reaction monitored by GC analysis

To a 25 mL Schlenk flask zinc powder (9 mmol), phenylacetylene (3 mmol),  $\text{Me}_3\text{SiCl}$  (3 mmol) and dry acetonitrile (10 mL) was added and the mixture was stirred at 100 °C. At the indicated time points, an aliquot was removed with a clean and dry syringe and analyzed by GC with FID detector using toluene as the internal standard.

Table S2. Time required to complete reaction under different temperatures

| t/h | Yield (%) |    |       | c:d |
|-----|-----------|----|-------|-----|
|     | c         | d  | Total |     |
| 1   | 6         | 3  | 9     | 2.0 |
| 2   | 12        | 6  | 18    | 2.0 |
| 3   | 40        | 20 | 60    | 2.0 |
| 5   | 46        | 23 | 69    | 2.0 |
| 6   | 47        | 26 | 73    | 1.8 |
| 8   | 58        | 30 | 88    | 2.0 |
| 10  | 60        | 30 | 90    | 2.0 |
| 12  | 64        | 34 | 98    | 2.0 |
| 20  | 66        | 33 | 99    | 2.0 |

### 3.3. Procedure for deuterated experiment

To a 25 mL Schlenk flask zinc powder (9 mmol), deuterated phenylacetylene (3 mmol),  $\text{Me}_3\text{SiCl}$  (3 mmol) and dry acetonitrile (10 mL) was added and the mixture is stirred at 100 °C for 10 h. The reaction liquid was taken with a clean, dry capillary tube and diluted in acetonitrile and analyzed by GC-MS. The yields were determined by GC with FID detector using toluene as the internal standard. The peak with a retention of 12.085 min was deuterated phenylacetylene while 12.448 min for deuterated styrene.

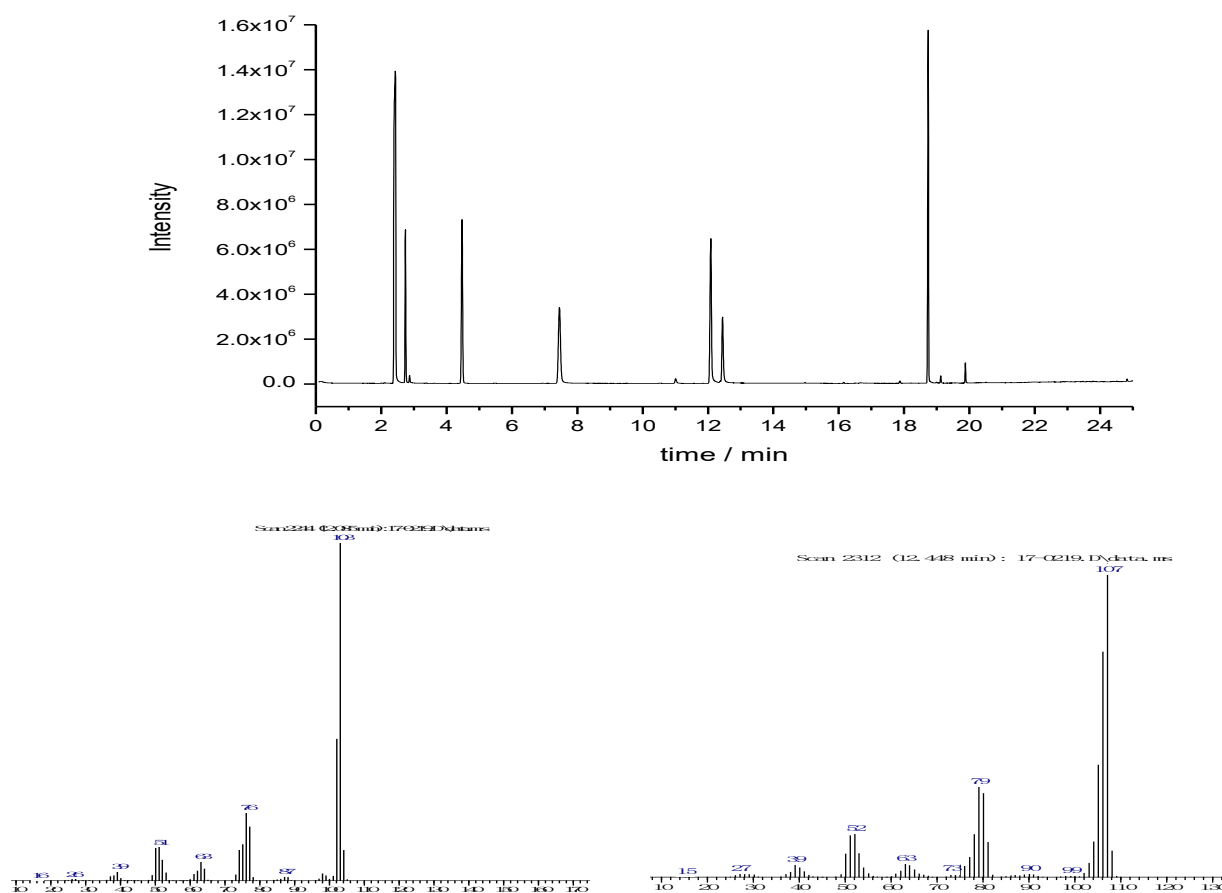

**Figure S1** GC-MS spectra for reaction liquid using deuterated phenylacetylene.

### 3.4. Procedure for acquisition of EPR spectra

To a 25 mL Schlenk flask zinc powder (3 mmol), phenylacetylene (1 mmol),  $\text{Me}_3\text{SiCl}$  (1 mmol) and dry acetonitrile (5 mL) was added and the mixture was stirred at 100 °C for 4 h. Then PBN (1 mmol) was added into the reaction liquid in the glove box, and the mixture was transferred into an sealed EPR tube. Removing from the glove box, the tube was quickly frozen in liquid nitrogen. The EPR spectrum was acquired at room temperature. For the spectra of single reactant, phenylacetylene or  $\text{Me}_3\text{SiCl}$  was used to react with zinc powder under the same conditions separately.

## 4. Benchmarking

### 4.1. K-point mesh

The Kpoint was chosen  $1 \times 1 \times 1$  as a higher kpoint mesh would lead to dramatically increased calculation cost. Although the  $1 \times 1 \times 1$  kpoint would overestimate some of the energies, it had little effect on the understanding of the mechanism of zinc promoted silylation.

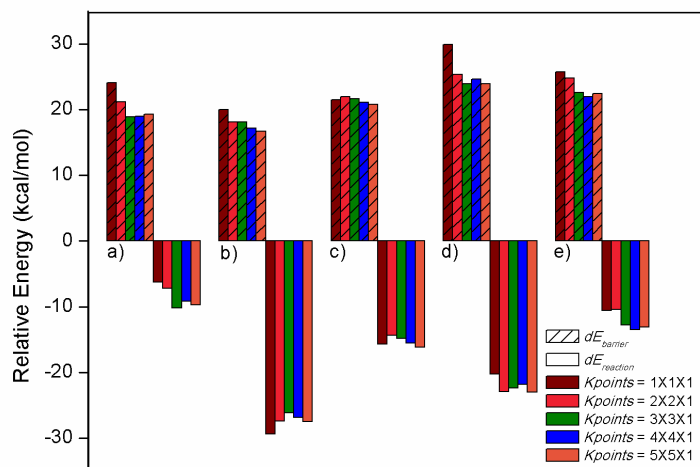

**Figure S2** Reaction barriers and energies with different K-point mesh. For a) H transfer from phenylacetylene to the inner carbon of alkynyl of phenylacetylene to form trans alkene species **A**; b) H transfer from phenylacetylene to the intermediate **A** to form alkene; c) H transfer from phenylacetylene to the outer carbon of alkynyl of phenylacetylene to form alkene species **C**; d) H transfer from phenylacetylene to the intermediate **C** to form alkene; e) Formation of phenylethynyltrimethylsilane.

#### 4.2. Cut-off energy

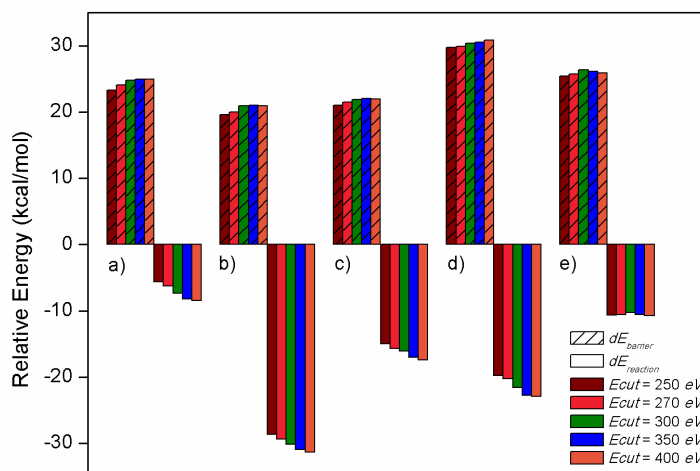

**Figure S3** Reaction barriers and energies with different cutoff energy. For a) H transfer from phenylacetylene to the inner carbon of alkynyl of phenylacetylene to form trans alkene species **A**; b) H transfer from phenylacetylene to the intermediate **A** to form alkene; c) H transfer from phenylacetylene to the outer carbon of alkynyl of phenylacetylene to form alkene species **C**; d) H transfer from phenylacetylene to the intermediate **C** to form alkene; e) Formation of phenylethynyltrimethylsilane.

### 4.3. Smearing

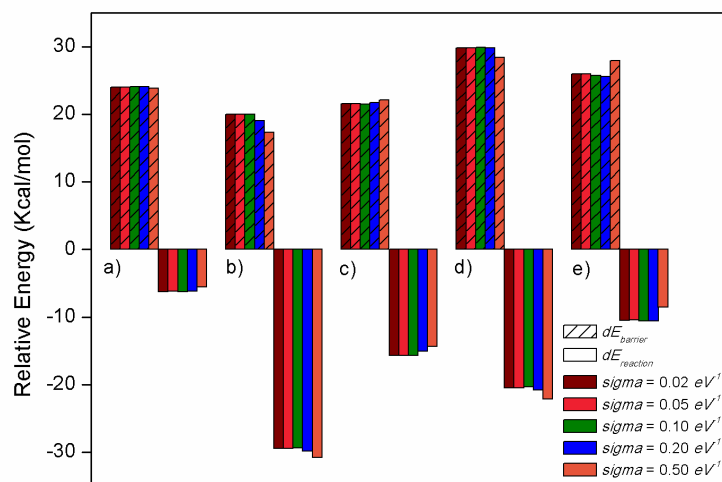

**Figure S4** Reaction barriers and energies with different smearing ( $\sigma$  value). For a) H transfer from phenylacetylene to the inner carbon of alkynyl of phenylacetylene to form trans alkene species **A**; b) H transfer from phenylacetylene to the intermediate **A** to form alkene; c) H transfer from phenylacetylene to the outer carbon of alkynyl of phenylacetylene to form alkene species **C**; d) H transfer from phenylacetylene to the intermediate **C** to form alkene; e) Formation of phenylethynyltrimethylsilane.

## 5. Supplemental data

### 5.1. Adsorption modes and sites

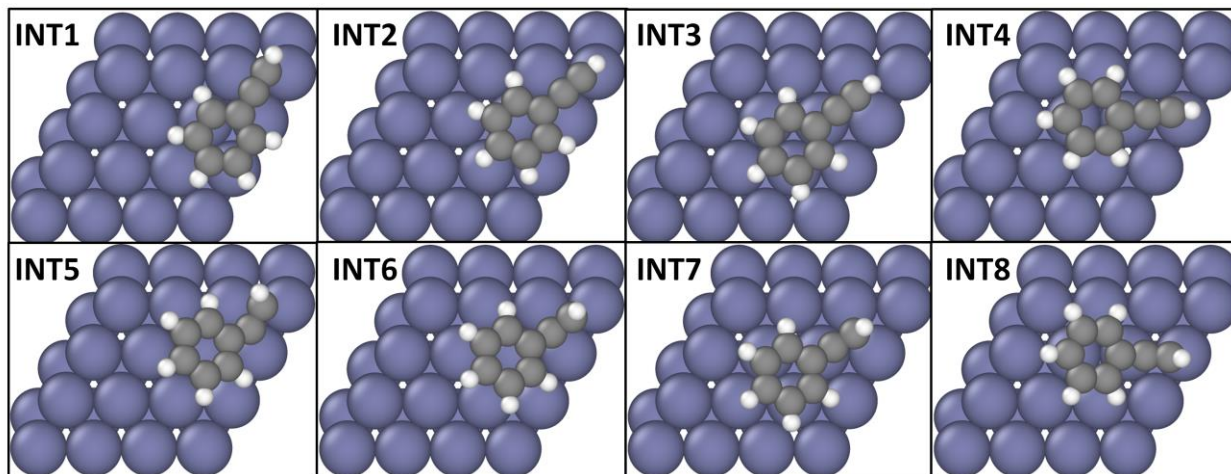

**Figure S5** Alkyne-mode (INT1-4) and alkene-mode (INT5-8) adsorption of phenylacetylene on zinc surface at different sites







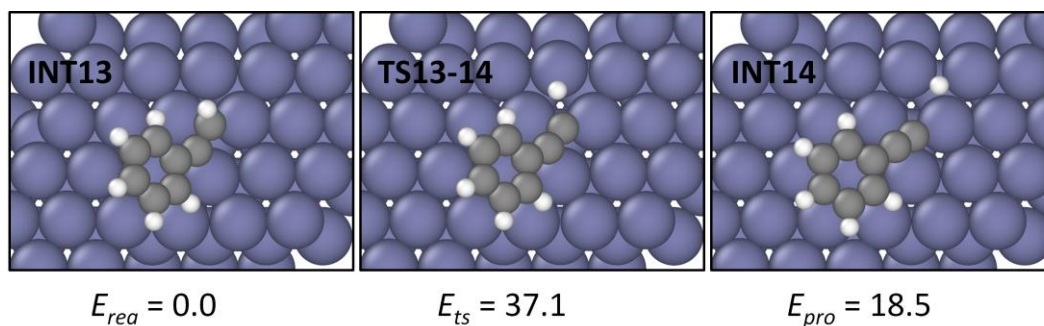

**Figure S8** Dissociation pathway of phenylacetylene on zinc surface. Energies (kcal/mol) are relative to reactant species.

**Mechanism V. Hydrogen transfer between adsorbed phenylacetylene on zinc surface**

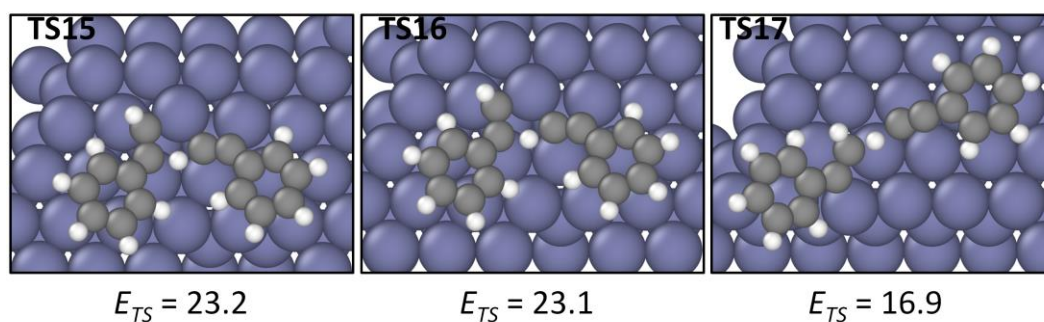

**Figure S9** Transition states of the first hydrogen transfer between the adsorbed phenylacetylene on zinc surface: TS15 for intermediate A; TS16 for intermediate B; TS17 for intermediate C. Energies (kcal/mol) are relative to reactant species.

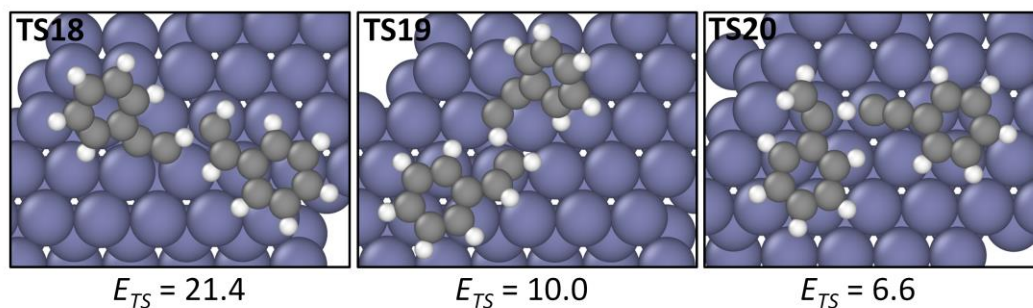

**Figure S10** Transition states of the second hydrogen transfer between the adsorbed phenylacetylene and alkene moieties on zinc surface: TS18 via intermediate A; TS19 via intermediate B; TS20 via intermediate C. Energies (kcal/mol) are relative to reactant species.

### 5.3. Product formation pathways

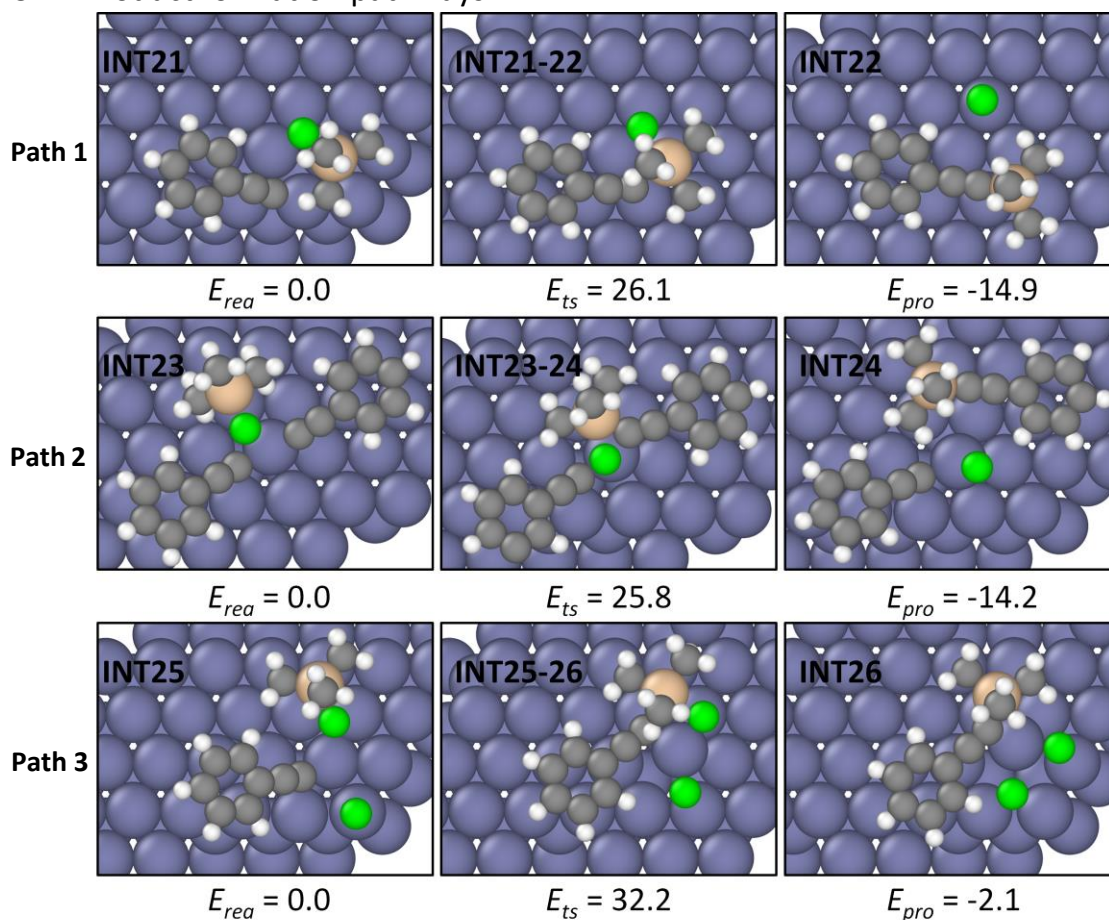

**Figure S11** Reaction pathways of for the formation step, path 1 via intermediate I  $\text{PhC}\equiv\text{C-Zn}$ ; path 2 via intermediate II  $(\text{PhC}\equiv\text{C})_2\text{Zn}$ ; path 3 via intermediate III  $\text{PhC}\equiv\text{CZnCl}$ . Energies ( $\text{kcal mol}^{-1}$ ) are relative to reactant species.

### 5.4. Bader charge analysis for the surface adsorbed species

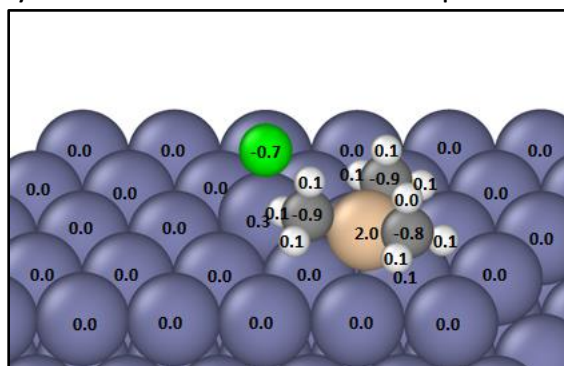

**Figure S12** Bader charges distribution of dissociation products of  $\text{Me}_3\text{SiCl}$  on zinc surface.

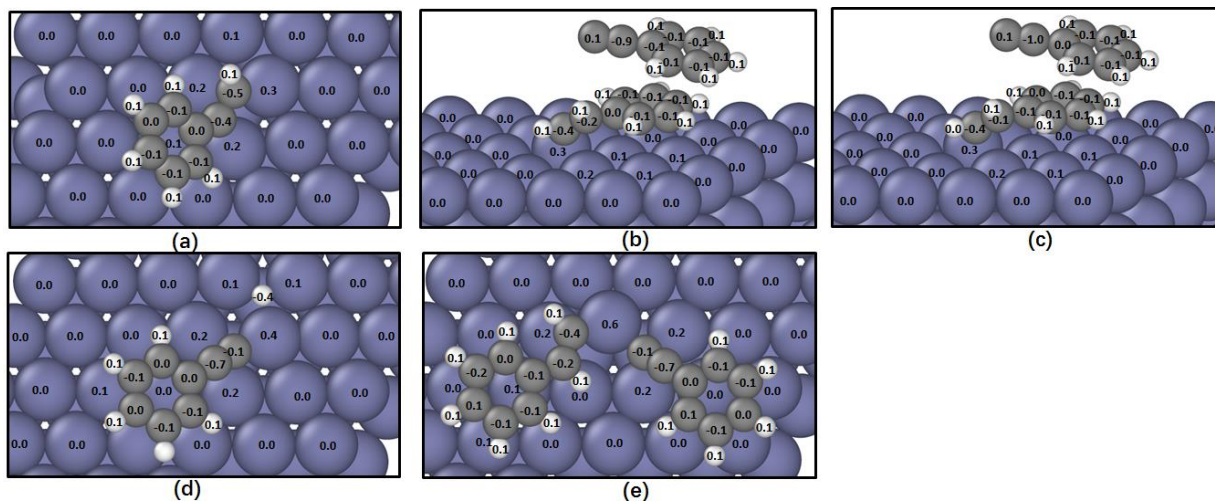

**Figure S13** Bader charge distribution for the intermediates of the interaction between phenylacetylene and zinc in the initiation stage of Scheme 3. For a) alkene-mode adsorption of phenylacetylene on zinc surface; b) H transfer from phenylacetylene dissolving in the solvent to the adsorbed phenylacetylene on zinc surface to form radical species; c) H transfer from phenylacetylene dissolving in the solvent to the adsorbed phenylacetylene on zinc surface to form ion species; d) phenylacetylene dissociated on zinc surface; e) H transfer between adsorbed phenylacetylene on zinc surface.



























Table with columns: ID, Value1, Value2, Value3, Value4, Value5, Value6, Value7, Value8, Value9, Value10. Contains 1000 rows of numerical data.

### POSCAR for TS18 ###  
Zn C H

Table with columns: ID, Value1, Value2, Value3, Value4, Value5, Value6, Value7, Value8, Value9, Value10. Contains 1000 rows of numerical data.

140 16 13  
Selective dynamics

Table with columns: ID, Value1, Value2, Value3, Value4, Value5, Value6, Value7, Value8, Value9, Value10. Contains 1000 rows of numerical data.



|                         |                     |                     |   |   |   |                      |                     |                     |   |   |   |
|-------------------------|---------------------|---------------------|---|---|---|----------------------|---------------------|---------------------|---|---|---|
| 17.3200443368065926     | 11.4916494145088931 | 6.9669789862216591  | T | T | T | 15.9712500000000617  | 0.0000000000000000  | 2.3863800000000821  | F | F | F |
| 19.984655722194820      | 11.4947127891603174 | 6.9441112059367613  | T | T | T | 1.33093999999998170  | 2.3052499999999632  | 2.3863800000000821  | F | F | F |
| 22.6456978126136698     | 11.5147257342816598 | 6.9851743084082560  | T | T | T | 3.99280999999998437  | 2.3052499999999632  | 2.3863800000000821  | F | F | F |
| 1.3316294543212863      | 2.3061249840898900  | 7.0230738422036385  | T | T | T | 6.6546900000000404   | 2.3052499999999632  | 2.3863800000000821  | F | F | F |
| 3.980376054703488       | 2.307015079419787   | 6.9529916982475530  | T | T | T | 9.3165599999999387   | 2.3052499999999632  | 2.3863800000000821  | F | F | F |
| 6.6323703460308678      | 2.2859127598549720  | 6.982202387747661   | T | T | T | 11.9784399999999742  | 2.3052499999999632  | 2.3863800000000821  | F | F | F |
| 9.295885831313296       | 2.2255101003304858  | 6.9838208017843852  | T | T | T | 14.6403100000000066  | 2.3052499999999632  | 2.3863800000000821  | F | F | F |
| 11.9859938979120493     | 2.2266019577354195  | 6.9391251512504400  | T | T | T | 17.3021900000000386  | 2.3052499999999632  | 2.3863800000000821  | F | F | F |
| 14.6671218174779909     | 2.2540263368885687  | 6.9905930155549774  | T | T | T | 2.6618799999999965   | 4.6105000000000089  | 2.3863800000000821  | F | F | F |
| 17.3286674518645931     | 2.2995668472208459  | 7.0280809254858037  | T | T | T | 5.3237500000000324   | 4.6105000000000089  | 2.3863800000000821  | F | F | F |
| 21.2811267785368700     | 4.6078802656945896  | 7.0264334933559240  | T | T | T | 7.9856300000000653   | 4.6105000000000089  | 2.3863800000000821  | F | F | F |
| 5.2867802038447302      | 4.5997443763352637  | 6.9939415857239267  | T | T | T | 10.6474999999999653  | 4.6105000000000089  | 2.3863800000000821  | F | F | F |
| 7.8863243229855868      | 4.580808821444994   | 6.9265076976393996  | T | T | T | 13.30937999999996136 | 4.6105000000000089  | 2.3863800000000821  | F | F | F |
| 10.5009334146348863     | 4.461215542102805   | 6.9828319242066104  | T | T | T | 15.97124999999996318 | 4.6105000000000089  | 2.3863800000000821  | F | F | F |
| 16.0268181449669882     | 4.5590514657053127  | 6.8362311199773407  | T | T | T | 18.6331300000000653  | 4.6105000000000089  | 2.3863800000000821  | F | F | F |
| 18.6522927302044330     | 4.5994971662706723  | 6.9816746346756355  | T | T | T | 22.6259363449999782  | 6.9157499999999708  | 2.3863800000000821  | F | F | F |
| 22.618626802335242      | 6.9086794063806076  | 7.0253185403206881  | T | T | T | 6.6546900000000111   | 6.9157499999999708  | 2.3863800000000821  | F | F | F |
| 6.613954948720553       | 6.9233893787236811  | 7.0218743502857821  | T | T | T | 9.31655999999998452  | 6.9157499999999708  | 2.3863800000000821  | F | F | F |
| 9.2308302535941195      | 6.9579935411767526  | 6.8644634839720871  | T | T | T | 11.9784399999999942  | 6.9157499999999708  | 2.3863800000000821  | F | F | F |
| 12.0531008236210688     | 7.0796310018100872  | 6.8559558962252778  | T | T | T | 14.6403099999999712  | 6.9157499999999708  | 2.3863800000000821  | F | F | F |
| 14.7785048225163097     | 6.9659947669330862  | 7.295975541962048   | T | T | T | 17.3021900000000102  | 6.9157499999999708  | 2.3863800000000821  | F | F | F |
| 17.3702197232621316     | 6.9251809993684930  | 6.917782282131496   | T | T | T | 19.9640600000000390  | 6.9157499999999708  | 2.3863800000000821  | F | F | F |
| 19.9811811426141404     | 6.9040132089655557  | 6.9944364052345431  | T | T | T | 23.956876345000120   | 9.2210100000000370  | 2.3863800000000821  | F | F | F |
| 23.958361001624333      | 9.2241813412015752  | 7.0345305239949454  | T | T | T | 7.9856300000000395   | 9.2210100000000370  | 2.3863800000000821  | F | F | F |
| 7.964553959284349       | 9.2363887196768815  | 7.0536926091202359  | T | T | T | 10.6475000000000737  | 9.2210100000000370  | 2.3863800000000821  | F | F | F |
| 10.6236046213097204     | 9.2699145229608539  | 6.9888053489239130  | T | T | T | 13.3093799999999778  | 9.2210100000000370  | 2.3863800000000821  | F | F | F |
| 13.3528830157133598     | 9.2759659031198829  | 6.9843093900165245  | T | T | T | 15.9712500000000102  | 9.2210100000000370  | 2.3863800000000821  | F | F | F |
| 16.017998857692837      | 9.2367792905562531  | 6.9481654570331113  | T | T | T | 18.6331300000000439  | 9.2210100000000370  | 2.3863800000000821  | F | F | F |
| 18.6677025115457764     | 9.2072631464448015  | 6.9691232256485553  | T | T | T | 21.2950000000000763  | 9.2210100000000370  | 2.3863800000000821  | F | F | F |
| 21.3179231158740166     | 9.2141731601280083  | 6.99465627738027091 | T | T | T | 18.6448592191956766  | 1.5469769446339174  | 4.6625978923913446  | T | T | T |
| 13.3640826169770222     | 4.4868182388896916  | 6.9659732199107340  | T | T | T | 2.6787982645322668   | 1.5481213626108778  | 4.6662302715337720  | T | T | T |
| 18.032485742227325      | 2.7317115321487515  | 10.4301416614338258 | T | T | T | 5.3380669979819384   | 1.5564662718633140  | 4.658559906919370   | T | T | T |
| 16.7580650796808317     | 2.2440921223049277  | 10.2001881061407733 | T | T | T | 7.97842532683635     | 1.5445074534141581  | 4.6637650165672642  | T | T | T |
| 16.5484124792766920     | 4.6348517568148031  | 10.0525962720131638 | T | T | T | 10.6490301608827771  | 1.5208823279028902  | 4.6435967040124250  | T | T | T |
| 17.6677971727431142     | 5.4907599065207684  | 10.1328214618140908 | T | T | T | 13.3274083856183876  | 1.5150971483517739  | 4.634429410902419   | T | T | T |
| 18.9418111251003864     | 4.9762615588478685  | 10.3668143611069965 | T | T | T | 15.99133408899657861 | 1.5306610898362112  | 4.675999110802325   | T | T | T |
| 19.1303824533215945     | 3.5974841698089693  | 10.5160608119095134 | T | T | T | 19.9789227740172315  | 3.8536217448134571  | 4.660210158985271   | T | T | T |
| 14.7955272413769165     | 6.3862949598238155  | 9.4117206396619695  | T | T | T | 3.9928236605170668   | 3.8592508454851870  | 4.6528236922052025  | T | T | T |
| 15.2316333764009215     | 5.11443357534442542 | 9.6582565093503145  | T | T | T | 6.6633370971075472   | 3.8582470608218236  | 4.666858438014301   | T | T | T |
| 9.525800892463630       | 8.3233841296321653  | 10.8669892464136345 | T | T | T | 9.338373784641563    | 3.8528092937072573  | 4.705666737368219   | T | T | T |
| 10.4615432517980462     | 7.6839509830011582  | 10.0557664273753158 | T | T | T | 11.9838650058800938  | 3.8345613039631514  | 4.7045210892666069  | T | T | T |
| 10.1861704557479253     | 6.4059032163546976  | 9.5300234068406020  | T | T | T | 14.6735779659645904  | 3.8312554941919226  | 4.6389351387859419  | T | T | T |
| 8.9904952578647155      | 5.7599909206167768  | 9.8961913474297454  | T | T | T | 17.3202584455287294  | 3.8467674881446228  | 4.6474692687506707  | T | T | T |
| 8.0676510160033903      | 6.3955370621099110  | 10.7256037421795636 | T | T | T | 21.3156346461744161  | 6.1549722690857944  | 4.6615496877191555  | T | T | T |
| 8.3209926538290055      | 7.6905236517595934  | 11.1891018523429864 | T | T | T | 5.3396560264902257   | 6.1571677738240576  | 4.6511011627949336  | T | T | T |
| 12.3883720675069267     | 5.5601778002028786  | 8.4544635179755332  | T | T | T | 7.9973270319418077   | 6.157083789400216   | 4.669389447229726   | T | T | T |
| 11.07397131919846136    | 5.8115847420645279  | 8.5288668736088731  | T | T | T | 10.6482461124092236  | 6.1445163859923824  | 4.7096720801562338  | T | T | T |
| 14.5266184978651580     | 4.2994819774697601  | 9.4139748438722588  | T | T | T | 13.3399728060192810  | 6.1431338561838293  | 4.6052986847954500  | T | T | T |
| 18.1809688680424415     | 1.6543616672382631  | 10.518278145780683  | T | T | T | 15.9891803025390224  | 6.149765455220898   | 4.6705738028238252  | T | T | T |
| 15.9069368247420190     | 2.5665103184552449  | 10.1005934213396156 | T | T | T | 18.6564404507552325  | 6.1529685149741002  | 4.6594822656124277  | T | T | T |
| 17.5328940795895463     | 6.5643863015622941  | 9.9819604303784697  | T | T | T | 22.6279180680932806  | 4.653059183277321   | 4.6511380080212402  | T | T | T |
| 19.7993441030808591     | 5.6498451785944046  | 10.4019874498467733 | T | T | T | 6.6659363698556584   | 4.6004140951744052  | 4.648151508603461   | T | T | T |
| 20.132944488788489      | 3.1977222536538901  | 10.6720801804483726 | T | T | T | 9.3613493935236232   | 4.6578463360041987  | 4.7933192500288650  | T | T | T |
| 15.353923267544106      | 7.2396319680065953  | 9.8272800838277679  | T | T | T | 11.9859317268793024  | 4.662460622206855   | 4.712373424280048   | T | T | T |
| 9.7300179430607709      | 9.3310570389690728  | 11.2322346708920335 | T | T | T | 14.6711604400689204  | 4.6468443611173448  | 4.621398789451929   | T | T | T |
| 11.3917404666865796     | 8.1865308084913115  | 9.7819815446724689  | T | T | T | 17.3164853195448352  | 4.6574054291855827  | 4.6614712556984115  | T | T | T |
| 8.789988086725433       | 4.7552539961100058  | 9.5145134641006184  | T | T | T | 19.9733301169878708  | 4.6541019864934324  | 4.6477216117474940  | T | T | T |
| 7.1399351071314001      | 5.8049902145626710  | 9.986786452540932   | T | T | T | 23.9743745425199748  | 10.7605080479316619 | 4.6647584017148571  | T | T | T |
| 7.5799603043958239      | 8.285964621601915   | 11.0019047205227392 | T | T | T | 7.9989774779319047   | 10.7600894563689124 | 4.642716273004189   | T | T | T |
| 13.818648918627730      | 6.0287643954516597  | 9.1574210047400832  | T | T | T | 10.6508001425918002  | 10.7694162365694766 | 4.6802120096162923  | T | T | T |
| ### POSCAR for TS# 1519 |                     |                     |   |   |   | 13.30765494807698418 | 10.755566587871155  | 4.6635988076885923  | T | T | T |
| Zn                      |                     |                     |   |   |   | 15.9771964802659845  | 10.7473446581822749 | 4.67553161780989537 | T | T | T |
| 1.0000000000000000      |                     |                     |   |   |   | 18.6487304762313357  | 10.7543488802317736 | 4.6663518904201906  | T | T | T |
| 18.6331263450000009     | 0.0000000000000000  | 0.0000000000000000  |   |   |   | 21.3189809199378111  | 10.7505117390213485 | 4.657922806773361   | T | T | T |
| 6.6546879800000003      | 11.5262576999999996 | 0.0000000000000000  |   |   |   | 25.2836752454775144  | 11.5327104244141765 | 9.9560434755103220  | T | T | T |
| 0.0000000000000000      | 0.0000000000000000  | 24.5455240289999985 |   |   |   | 2.6294764297729438   | 0.055135429129244   | 9.9871464057457872  | T | T | T |
| 140                     | 16                  | 13                  |   |   |   | 5.3540466347814641   | 0.0532665646506199  | 9.9759353240469792  | T | T | T |
| Selective dynamics      |                     |                     |   |   |   | 14.6566702133470298  | 11.530048856751191  | 7.0007917485174964  | T | T | T |
| Cartesian               |                     |                     |   |   |   | 17.3273957810919725  | 11.492610198748203  | 6.986902691456320   | T | T | T |
| 18.6331299999999800     | 1.5368299999999688  | 0.0000000000000000  | F | F | F | 19.9994956720407515  | 11.4850833071601812 | 6.979043810252382   | T | T | T |
| 2.6618800000000453      | 1.5368299999999688  | 0.0000000000000000  | F | F | F | 22.6458032800277419  | 11.5124511045811975 | 7.0035842479559298  | T | T | T |
| 5.3237499999999462      | 1.5368299999999688  | 0.0000000000000000  | F | F | F | 1.3444969916422896   | 2.3211597396299806  | 6.972725470442326   | T | T | T |
| 7.9856299999999747      | 1.5368299999999688  | 0.0000000000000000  | F | F | F | 4.0081243521544883   | 2.319920404         |                     |   |   |   |



|                     |                     |                    |   |   |   |                            |                     |                     |   |   |   |
|---------------------|---------------------|--------------------|---|---|---|----------------------------|---------------------|---------------------|---|---|---|
| 5.3237500000000599  | 6.1473399999999971  | 0.0000000000000000 | F | F | F | 3.9994477117661305         | 6.8914218467807489  | 6.9592251370708462  | T | T | T |
| 7.9856299999999578  | 6.1473399999999971  | 0.0000000000000000 | F | F | F | 6.6519346457843627         | 6.9080560536002844  | 7.0100642097442183  | T | T | T |
| 10.6474999999999920 | 6.1473399999999971  | 0.0000000000000000 | F | F | F | 9.3026814944918529         | 6.9166818057512646  | 7.0026100631805130  | T | T | T |
| 13.3093800000000222 | 6.1473399999999971  | 0.0000000000000000 | F | F | F | 11.9580312634667365        | 6.9306527618042386  | 7.0202275982735340  | T | T | T |
| 15.9712500000000546 | 6.1473399999999971  | 0.0000000000000000 | F | F | F | 14.6452504157008789        | 6.9164363920683050  | 7.0436040247187554  | T | T | T |
| 18.6331299999999551 | 6.1473399999999971  | 0.0000000000000000 | F | F | F | 17.2995223309081787        | 6.9126389064910114  | 7.011788771707924   | T | T | T |
| 22.6259400000000106 | 6.4525900000000416  | 0.0000000000000000 | F | F | F | 19.9735936395895415        | 6.8876386659873669  | 6.985059436667454   | T | T | T |
| 6.6546900000000839  | 6.4525900000000416  | 0.0000000000000000 | F | F | F | 5.3253984715715195         | 9.2058364965122390  | 6.999762064824750   | T | T | T |
| 9.3165599999999849  | 6.4525900000000416  | 0.0000000000000000 | F | F | F | 7.9822703302838107         | 9.2119404839480996  | 7.0025617737005250  | T | T | T |
| 11.9784400000000133 | 6.4525900000000416  | 0.0000000000000000 | F | F | F | 10.6436345027167789        | 9.2183498769835630  | 6.9778458204477181  | T | T | T |
| 14.6403100000000492 | 6.4525900000000416  | 0.0000000000000000 | F | F | F | 13.3031184869577807        | 9.218035329555732   | 6.9695621226053186  | T | T | T |
| 17.3021900000000812 | 6.4525900000000416  | 0.0000000000000000 | F | F | F | 15.9723807428690314        | 9.2013342728992367  | 7.0088015695090807  | T | T | T |
| 19.9640599999999786 | 6.4525900000000416  | 0.0000000000000000 | F | F | F | 18.6220765569655317        | 9.1762262070632055  | 7.0190760658148568  | T | T | T |
| 23.9568799999999911 | 10.7578400000000052 | 0.0000000000000000 | F | F | F | 21.3057408509919277        | 9.1626321936395208  | 7.0061832939400446  | T | T | T |
| 7.9856300000000617  | 10.7578400000000052 | 0.0000000000000000 | F | F | F | 13.2929997830250900        | 6.6945024960923698  | 6.9383499448076639  | T | T | T |
| 10.6474999999999618 | 10.7578400000000052 | 0.0000000000000000 | F | F | F | 9.5866223105225501         | 4.9632284762140264  | 10.4432444642533666 | T | T | T |
| 13.3093799999999938 | 10.7578400000000052 | 0.0000000000000000 | F | F | F | 10.8917694528622402        | 4.5943570006321321  | 10.1169985538815118 | T | T | T |
| 15.9712500000000261 | 10.7578400000000052 | 0.0000000000000000 | F | F | F | 11.2135534795858440        | 3.2275740214402919  | 9.95856736867373664 | T | T | T |
| 18.6331300000000581 | 10.7578400000000052 | 0.0000000000000000 | F | F | F | 10.2105032460779025        | 2.2484698876341573  | 10.1743324337554382 | T | T | T |
| 21.2949999999999591 | 10.7578400000000052 | 0.0000000000000000 | F | F | F | 8.9231217628190999         | 2.6320161700716202  | 10.5005132155333332 | T | T | T |
| 0.0000000000000000  | 0.0000000000000000  | 2.3863800000000821 | F | F | F | 8.59780905010480036        | 3.9908570584973178  | 10.6148640027239085 | T | T | T |
| 2.6618800000000324  | 0.0000000000000000  | 2.3863800000000821 | F | F | F | 13.2528646579392871        | 2.6324551926541067  | 8.5215276625907795  | T | T | T |
| 5.3237500000000644  | 0.0000000000000000  | 2.3863800000000821 | F | F | F | 12.4371495422662619        | 2.868485289449255   | 9.336172163702829   | T | T | T |
| 7.9856299999999631  | 0.0000000000000000  | 2.3863800000000821 | F | F | F | 16.0246747943064776        | 2.5745660006492441  | 10.7804115164148868 | T | T | T |
| 10.6474999999999973 | 0.0000000000000000  | 2.3863800000000821 | F | F | F | 15.9662460383769826        | 4.6311881605810949  | 10.8117066291318873 | T | T | T |
| 13.3093800000000275 | 0.0000000000000000  | 2.3863800000000821 | F | F | F | 17.9395029164092570        | 4.9905604424091319  | 10.6917529969365540 | T | T | T |
| 15.9712500000000617 | 0.0000000000000000  | 2.3863800000000821 | F | F | F | 9.3355353749429835         | 6.0237362810926944  | 10.5269329809307660 | T | T | T |
| 1.3309399999999771  | 2.3052499999999632  | 2.3863800000000821 | F | F | F | 11.6606761379142618        | 5.3454811394842059  | 9.9491310981926799  | T | T | T |
| 3.9928100000000093  | 2.3052499999999632  | 2.3863800000000821 | F | F | F | 10.4670118818269913        | 1.1951049392226121  | 10.0394171686857043 | T | T | T |
| 6.6546900000000422  | 2.3052499999999632  | 2.3863800000000821 | F | F | F | 8.1521650839795746         | 1.8739255697454418  | 10.628746655745732  | T | T | T |
| 9.3165599999999422  | 2.3052499999999632  | 2.3863800000000821 | F | F | F | 7.5732746166636771         | 4.2897803268352135  | 10.837827865121812  | T | T | T |
| 11.9784399999999742 | 2.3052499999999632  | 2.3863800000000821 | F | F | F | 14.9965384390069989        | 2.2449246234814191  | 10.9813490060546943 | T | T | T |
| 14.6403100000000066 | 2.3052499999999632  | 2.3863800000000821 | F | F | F | 16.7198713087458231        | 1.94236554957085650 | 11.35529333487612   | T | T | T |
| 17.3021900000000386 | 2.3052499999999632  | 2.3863800000000821 | F | F | F | 16.2282265268430379        | 2.4183636309630598  | 9.710497205606005   | T | T | T |
| 2.6618800000000018  | 4.6105000000000089  | 2.3863800000000821 | F | F | F | 14.9514423437130777        | 4.3043217555998563  | 13.3490300563965896 | T | T | T |
| 5.3237500000000342  | 4.6105000000000089  | 2.3863800000000821 | F | F | F | 16.0736466487287899        | 5.6923208334166935  | 13.3468763393801616 | T | T | T |
| 7.9856300000000671  | 4.6105000000000089  | 2.3863800000000821 | F | F | F | 16.6865432182177251        | 4.0475239828737237  | 13.679521302183161  | T | T | T |
| 10.6474999999999671 | 4.6105000000000089  | 2.3863800000000821 | F | F | F | 18.7485022595444626        | 4.4264648767596846  | 11.1792337029239325 | T | T | T |
| 13.3093799999999973 | 4.6105000000000089  | 2.3863800000000821 | F | F | F | 18.0664732135114221        | 6.0584188987542875  | 10.9172533923099994 | T | T | T |
| 15.9712500000000333 | 4.6105000000000089  | 2.3863800000000821 | F | F | F | 18.0380296772766693        | 4.8567183714771156  | 9.603770673636644   | T | T | T |
| 18.6331300000000653 | 4.6105000000000089  | 2.3863800000000821 | F | F | F | 14.8283239961888977        | 5.527997581505310   | 10.2600014083754210 | T | T | T |
| 3.9928136549999404  | 6.9157499999999708  | 2.3863800000000821 | F | F | F | 16.2807465359033898        | 4.3578904882876319  | 11.2616467323296199 | T | T | T |
| 6.6546900000000129  | 6.9157499999999708  | 2.3863800000000821 | F | F | F | ### POSCAR for TS21-22 ### |                     |                     |   |   |   |
| 9.3165600000000452  | 6.9157499999999708  | 2.3863800000000821 | F | F | F | Zn C H Cl Si               |                     |                     |   |   |   |
| 11.9784399999999422 | 6.9157499999999708  | 2.3863800000000821 | F | F | F | 1.0000000000000000         |                     |                     |   |   |   |
| 14.6403099999999764 | 6.9157499999999708  | 2.3863800000000821 | F | F | F | 18.6331263450000009        | 0.0000000000000000  | 0.0000000000000000  |   |   |   |
| 17.3021900000000102 | 6.9157499999999708  | 2.3863800000000821 | F | F | F | 6.6546879800000003         | 11.5262576909999996 | 0.0000000000000000  |   |   |   |
| 19.9640600000000390 | 6.9157499999999708  | 2.3863800000000821 | F | F | F | 0.0000000000000000         | 0.0000000000000000  | 24.545240209999985  |   |   |   |
| 5.3237536549999742  | 9.2210100000000370  | 2.3863800000000821 | F | F | F | 140 11 14 1                |                     |                     |   |   |   |
| 7.9856300000000449  | 9.2210100000000370  | 2.3863800000000821 | F | F | F | Selective dynamics         |                     |                     |   |   |   |
| 10.6475000000000790 | 9.2210100000000370  | 2.3863800000000821 | F | F | F | Cartesian                  |                     |                     |   |   |   |
| 13.3093799999999796 | 9.2210100000000370  | 2.3863800000000821 | F | F | F | 18.6331299999999800        | 1.5368299999999688  | 0.0000000000000000  | F | F | F |
| 15.9712500000000119 | 9.2210100000000370  | 2.3863800000000821 | F | F | F | 2.6618800000000453         | 1.5368299999999688  | 0.0000000000000000  | F | F | F |
| 18.6331300000000439 | 9.2210100000000370  | 2.3863800000000821 | F | F | F | 5.3237499999999462         | 1.5368299999999688  | 0.0000000000000000  | F | F | F |
| 21.2950000000000763 | 9.2210100000000370  | 2.3863800000000821 | F | F | F | 7.9856299999999747         | 1.5368299999999688  | 0.0000000000000000  | F | F | F |
| 18.629523894143833  | 1.5414770498975218  | 4.6668182289275411 | T | T | T | 10.6475000000000115        | 1.5368299999999688  | 0.0000000000000000  | F | F | F |
| 2.6698564665867015  | 1.54314007339439636 | 4.6736782120615468 | T | T | T | 13.3093800000000435        | 1.5368299999999688  | 0.0000000000000000  | F | F | F |
| 5.3240998427418646  | 1.5445469877000977  | 4.6803970047209482 | T | T | T | 15.9712499999999373        | 1.5368299999999688  | 0.0000000000000000  | F | F | F |
| 7.9747906677059764  | 1.5403240348418832  | 4.657230527474903  | T | T | T | 19.9640600000000106        | 3.8420900000000340  | 0.0000000000000000  | F | F | F |
| 10.6280523470900129 | 1.5329441968942605  | 4.5973023574412029 | T | T | T | 3.9928100000000012         | 3.8420900000000340  | 0.0000000000000000  | F | F | F |
| 13.3282186879941591 | 1.5392932562916440  | 4.7204770654172029 | T | T | T | 6.6546900000000324         | 3.8420900000000340  | 0.0000000000000000  | F | F | F |
| 15.9636187557231710 | 1.5476601008410337  | 4.672002095241827  | T | T | T | 9.3165599999999849         | 3.8420900000000340  | 0.0000000000000000  | F | F | F |
| 19.9805971652513055 | 3.8495726297701904  | 4.6537102920166173 | T | T | T | 11.9784400000000453        | 3.8420900000000340  | 0.0000000000000000  | F | F | F |
| 3.9966794854822414  | 3.8495951176722812  | 4.6768361998203467 | T | T | T | 14.6403100000000777        | 3.8420900000000340  | 0.0000000000000000  | F | F | F |
| 6.648789172178847   | 3.8434364329720821  | 4.6727295508410592 | T | T | T | 17.3021900000000812        | 3.8420900000000340  | 0.0000000000000000  | F | F | F |
| 9.2957645943095315  | 3.8485004537768654  | 4.6457171156926274 | T | T | T | 21.2949999999999804        | 3.8420900000000340  | 0.0000000000000000  | F | F | F |
| 11.9964386196381518 | 3.84207160435959704 | 4.7319324187406648 | T | T | T | 5.3237500000000546         | 6.1473399999999971  | 0.0000000000000000  | F | F | F |
| 14.654933002325890  | 3.8197432117202470  | 4.7575954651912014 | T | T | T | 7.9856299999999587         | 6.1473399999999971  | 0.0000000000000000  | F | F | F |
| 17.3279677406967565 | 3.84114004308987662 | 4.6304658983877189 | T | T | T | 10.6474999999999920        | 6.1473399999999971  | 0.0000000000000000  | F | F | F |
| 21.298352000294817  | 4.1491498027430204  | 4.6697769957465090 | T | T | T | 13.3093800000000222        | 6.1473399999999971  | 0.0000000000000000  | F | F | F |
| 5.342039638963196   | 6.1376216266916819  | 4.6715410839647884 | T | T | T | 15.9712500000000510        | 6.1473399999999971  | 0.0000000000000000  | F | F | F |
| 7.9984173191864372  | 6.1493979388264721  | 4.6683741899712610 | T | T | T | 18.6331299999999480        | 6.1473399999999971  | 0.0000000000000000  | F | F | F |
| 10.655252353160652  | 6.1676075523959623  | 4.6557399625717641 | T | T | T | 22.6259399999              |                     |                     |   |   |   |

|                      |                      |                     |   |   |   |                     |                    |                    |       |
|----------------------|----------------------|---------------------|---|---|---|---------------------|--------------------|--------------------|-------|
| 11.97843999999999422 | 6.91574999999999708  | 2.3863800000000821  | F | F | F | 1.000000000000000   |                    |                    |       |
| 14.64030999999999728 | 6.91574999999999708  | 2.3863800000000821  | F | F | F | 18.633126345000009  | 0.000000000000000  | 0.000000000000000  |       |
| 17.3021900000000102  | 6.91574999999999708  | 2.3863800000000821  | F | F | F | 6.654687980000003   | 11.526257699999996 | 0.000000000000000  |       |
| 19.9640600000000390  | 6.91574999999999708  | 2.3863800000000821  | F | F | F | 0.000000000000000   | 0.000000000000000  | 24.545524029999985 |       |
| 5.3237536549999671   | 9.2210100000000370   | 2.3863800000000821  | F | F | F | 140                 | 11                 | 14                 | 1     |
| 7.9856300000000395   | 9.2210100000000370   | 2.3863800000000821  | F | F | F | Selective dynamics  |                    |                    |       |
| 10.6475000000000737  | 9.2210100000000370   | 2.3863800000000821  | F | F | F | Cartesian           |                    |                    |       |
| 13.3093799999999778  | 9.2210100000000370   | 2.3863800000000821  | F | F | F | 18.6331299999999764 | 1.5368299999999688 | 0.000000000000000  | F F F |
| 15.9712500000000102  | 9.2210100000000370   | 2.3863800000000821  | F | F | F | 2.6618800000000480  | 1.5368299999999688 | 0.000000000000000  | F F F |
| 18.6331300000000439  | 9.2210100000000370   | 2.3863800000000821  | F | F | F | 5.3237499999999480  | 1.5368299999999688 | 0.000000000000000  | F F F |
| 21.2950000000000763  | 9.2210100000000370   | 2.3863800000000821  | F | F | F | 7.9856299999999809  | 1.5368299999999688 | 0.000000000000000  | F F F |
| 18.6417260284227666  | 1.5441048084822281   | 4.6676114062342435  | T | T | T | 10.6475000000000115 | 1.5368299999999688 | 0.000000000000000  | F F F |
| 2.6701218624964573   | 1.5494472224617176   | 4.6815234459969307  | T | T | T | 13.3093800000000435 | 1.5368299999999688 | 0.000000000000000  | F F F |
| 5.3277394117051449   | 1.548407799989997    | 4.670747720015254   | T | T | T | 15.9712499999999427 | 1.5368299999999688 | 0.000000000000000  | F F F |
| 7.9848172318576579   | 1.5485381830214073   | 4.6675519415537527  | T | T | T | 19.9640600000000106 | 3.8420900000000340 | 0.000000000000000  | F F F |
| 10.6448324612872209  | 1.5429301692885951   | 4.6528167062992525  | T | T | T | 3.9928100000000812  | 3.8420900000000340 | 0.000000000000000  | F F F |
| 13.34218511801095383 | 1.5600871581167628   | 4.6964870839981376  | T | T | T | 6.6546899999999989  | 3.8420900000000340 | 0.000000000000000  | F F F |
| 15.96414924201449795 | 1.5507828295900358   | 4.6754399131422346  | T | T | T | 9.3165600000000133  | 3.8420900000000340 | 0.000000000000000  | F F F |
| 19.9701581364774299  | 3.8545990648417692   | 4.6716091087781365  | T | T | T | 11.9784400000000453 | 3.8420900000000340 | 0.000000000000000  | F F F |
| 3.9980674015423063   | 3.8582674714666872   | 4.6766514423809236  | T | T | T | 14.6403100000000777 | 3.8420900000000340 | 0.000000000000000  | F F F |
| 6.558252122390673    | 3.8511897681395465   | 4.6728453075386218  | T | T | T | 17.3021900000000812 | 3.8420900000000340 | 0.000000000000000  | F F F |
| 9.3296473641385251   | 3.8497703699506185   | 4.66780732131022543 | T | T | T | 21.294999999999875  | 6.1473399999999971 | 0.000000000000000  | F F F |
| 11.9882153855773215  | 3.8475728944046991   | 4.6513089413337623  | T | T | T | 5.3237500000000599  | 6.1473399999999971 | 0.000000000000000  | F F F |
| 14.6495748179355747  | 3.8141705781173102   | 4.7234791593917260  | T | T | T | 7.9856299999999578  | 6.1473399999999971 | 0.000000000000000  | F F F |
| 17.3171939904204275  | 3.8455992138498756   | 4.6478522168940195  | T | T | T | 10.6475000000000115 | 6.1473399999999971 | 0.000000000000000  | F F F |
| 21.3008128684280009  | 6.1593108022508680   | 4.6796208197624516  | T | T | T | 13.3093800000000222 | 6.1473399999999971 | 0.000000000000000  | F F F |
| 5.3323891920921151   | 6.1533028390689437   | 4.6761435756428495  | T | T | T | 15.9712500000000546 | 6.1473399999999971 | 0.000000000000000  | F F F |
| 7.9993173483806214   | 6.1517194894817503   | 4.6700706301224590  | T | T | T | 18.6331299999999551 | 6.1473399999999971 | 0.000000000000000  | F F F |
| 10.6619909191039195  | 6.1440971828831072   | 4.673698564730012   | T | T | T | 22.6259400000000106 | 8.4525900000000416 | 0.000000000000000  | F F F |
| 13.3271510806532429  | 6.1589505420562884   | 4.6737314218169177  | T | T | T | 6.6546900000000839  | 8.4525900000000416 | 0.000000000000000  | F F F |
| 15.9713351884421346  | 6.163309637728244    | 4.674920555626396   | T | T | T | 9.3165599999999849  | 8.4525900000000416 | 0.000000000000000  | F F F |
| 18.637427063104171   | 6.155426254346437    | 4.6700996733310642  | T | T | T | 11.9784400000000133 | 8.4525900000000416 | 0.000000000000000  | F F F |
| 22.6326745920629584  | 6.4640524424509884   | 4.6770123842954874  | T | T | T | 14.6403100000000492 | 8.4525900000000416 | 0.000000000000000  | F F F |
| 6.5679892851402164   | 6.4606900945282693   | 4.6768224300700085  | T | T | T | 17.3021900000000812 | 8.4525900000000416 | 0.000000000000000  | F F F |
| 9.3250653627005562   | 6.4600565343047485   | 4.6738595097949611  | T | T | T | 19.9640599999999786 | 8.4525900000000416 | 0.000000000000000  | F F F |
| 11.9878611415205043  | 6.4630687389467720   | 4.6726630422924540  | T | T | T | 23.9568799999999911 | 10.757840000000052 | 0.000000000000000  | F F F |
| 14.6456038202935748  | 6.4602521480220046   | 4.6699175703568452  | T | T | T | 7.9856300000000617  | 10.757840000000052 | 0.000000000000000  | F F F |
| 17.3092534410639800  | 6.4624889112235623   | 4.6725294581542673  | T | T | T | 10.6475000000000618 | 10.757840000000052 | 0.000000000000000  | F F F |
| 19.9739711423115871  | 6.4638019437916174   | 4.6775583616107923  | T | T | T | 13.3093799999999938 | 10.757840000000052 | 0.000000000000000  | F F F |
| 23.956099351085662   | 10.7767184569528894  | 4.682474552738062   | T | T | T | 15.9712500000000261 | 10.757840000000052 | 0.000000000000000  | F F F |
| 7.9875778350592812   | 10.7694047879597319  | 4.6750394889152389  | T | T | T | 18.6331300000000581 | 10.757840000000052 | 0.000000000000000  | F F F |
| 10.6513840524070353  | 10.7727708227050165  | 4.6657309968359755  | T | T | T | 21.2949999999999591 | 10.757840000000052 | 0.000000000000000  | F F F |
| 13.3125093492302611  | 10.7689705203523175  | 4.6730451861125353  | T | T | T | 0.0000000000000000  | 0.000000000000000  | 2.3863800000000821 | F F F |
| 15.9754885616584126  | 10.7661398005350168  | 4.6744649147645978  | T | T | T | 2.6618800000000324  | 0.000000000000000  | 2.3863800000000821 | F F F |
| 18.6437779472531417  | 10.77070878063184476 | 4.6729476808804415  | T | T | T | 5.3237500000000644  | 0.000000000000000  | 2.3863800000000821 | F F F |
| 21.3029414642967225  | 10.780772796533749   | 4.6832536192396503  | T | T | T | 7.9856299999999631  | 0.000000000000000  | 2.3863800000000821 | F F F |
| 18.6169952798232750  | 0.0161788914542927   | 7.0199534653183973  | T | T | T | 10.6474999999999973 | 0.000000000000000  | 2.3863800000000821 | F F F |
| 2.6502395257988844   | 0.0118387921308438   | 7.0065699567991278  | T | T | T | 13.3093800000000275 | 0.000000000000000  | 2.3863800000000821 | F F F |
| 11.9715624284046243  | 11.5390772763818354  | 7.0162648163599606  | T | T | T | 15.9712500000000617 | 0.000000000000000  | 2.3863800000000821 | F F F |
| 14.6379783779038402  | 11.533545261359116   | 6.9950425627683117  | T | T | T | 1.3309399999999771  | 2.3052499999999632 | 2.3863800000000821 | F F F |
| 17.3031970586125787  | 11.5339085634389171  | 6.9864530312284980  | T | T | T | 3.9928100000000093  | 2.3052499999999632 | 2.3863800000000821 | F F F |
| 13.3146180923489919  | 0.0535974461750898   | 6.9976159203927635  | T | T | T | 6.6546900000000422  | 2.3052499999999632 | 2.3863800000000821 | F F F |
| 15.9402843038747246  | 0.046638747396359    | 7.0211134836001206  | T | T | T | 9.3165599999999422  | 2.3052499999999632 | 2.3863800000000821 | F F F |
| 19.9496808649642432  | 2.3212548676270930   | 6.9968439815051608  | T | T | T | 11.9784399999999742 | 2.3052499999999632 | 2.3863800000000821 | F F F |
| 3.9910489041583972   | 2.3156362588995338   | 6.9949308428102528  | T | T | T | 14.6403100000000666 | 2.3052499999999632 | 2.3863800000000821 | F F F |
| 6.6431791182780664   | 2.309582786144922    | 7.0079253316610526  | T | T | T | 17.3021900000000838 | 2.3052499999999632 | 2.3863800000000821 | F F F |
| 9.3005886685437140   | 2.3069913245093532   | 6.9825645100171698  | T | T | T | 2.6618800000000018  | 4.6105000000000089 | 2.3863800000000821 | F F F |
| 11.9626029390291500  | 2.3185496073499392   | 6.9123181698616243  | T | T | T | 5.3237500000000342  | 4.6105000000000089 | 2.3863800000000821 | F F F |
| 14.682894167543631   | 2.3409964409356929   | 6.6563133040464235  | T | T | T | 7.9856300000000671  | 4.6105000000000089 | 2.3863800000000821 | F F F |
| 17.2827839089125378  | 2.3245987460928993   | 6.9446783573038292  | T | T | T | 10.6475000000000671 | 4.6105000000000089 | 2.3863800000000821 | F F F |
| 21.2817408579145117  | 6.1393810920667716   | 7.0199357682176755  | T | T | T | 13.3093799999999973 | 4.6105000000000089 | 2.3863800000000821 | F F F |
| 5.3121150840642740   | 6.6218990425418642   | 7.017452631558185   | T | T | T | 15.9712500000000333 | 4.6105000000000089 | 2.3863800000000821 | F F F |
| 7.9840463364336207   | 6.617860305311696    | 6.9984993146179873  | T | T | T | 18.6331300000000653 | 4.6105000000000089 | 2.3863800000000821 | F F F |
| 10.6519312171212501  | 4.608342883604927    | 7.048238983604927   | T | T | T | 3.9928136549999400  | 6.9157499999999708 | 2.3863800000000821 | F F F |
| 15.9770007151697033  | 4.6066814513807966   | 6.9108660834345672  | T | T | T | 6.6546900000000129  | 6.9157499999999708 | 2.3863800000000821 | F F F |
| 18.6278955881608006  | 4.6215490782764814   | 7.0015352488997804  | T | T | T | 9.3165600000000452  | 6.9157499999999708 | 2.3863800000000821 | F F F |
| 22.612625108184616   | 6.9337222506754017   | 7.0094891834016032  | T | T | T | 11.9784399999999422 | 6.9157499999999708 | 2.3863800000000821 | F F F |
| 6.6529122549191529   | 6.9286962388085099   | 7.0064912609901949  | T | T | T | 14.6403099999999764 | 6.9157499999999708 | 2.3863800000000821 | F F F |
| 9.3216109236294589   | 6.9130640821716778   | 6.9872214093842349  | T | T | T | 17.3021900000000102 | 6.9157499999999708 | 2.3863800000000821 | F F F |
| 11.9783847225490376  | 6.9113010238809451   | 6.9854023738416835  | T | T | T | 19.9640600000000390 | 6.9157499999999708 | 2.3863800000000821 | F F F |
| 14.6371658445531985  | 6.9111758437556459   | 7.0095914241193552  | T | T | T | 5.3237536549999742  | 9.2210100000000370 | 2.3863800000000821 | F F F |
| 17.2946380289280057  | 6.9215669928079349   | 7.0023657184218937  | T | T | T | 7.9856300000000049  | 9.2210100000000370 | 2.3863800000000821 | F F F |
| 19.9523511746328666  | 6.9297507901742561   | 7.0157938317284030  | T | T | T | 10.6475000000000796 | 9.2210100000000370 | 2.3863800000000821 | F F F |
| 23.9450016548504010  | 6.9239250610645924   | 7.0093442773904542  | T | T | T | 13.3093799999999796 | 9.2210100000000370 | 2.3863800000000821 | F F F |
| 7.9784282537828357   | 6.9234763621432947   | 6.9844678942398577  | T | T | T | 15.9712500000000119 | 9.2210100000000370 | 2.3863800000000821 | F F F |
| 10.6437037122592546  | 6.9220590596711935   | 6.9813955738824154  | T | T | T | 18.6331300000000439 | 9.2210100000000370 | 2.3863800000000821 |       |

|                     |                     |                      |   |   |   |
|---------------------|---------------------|----------------------|---|---|---|
| 18.6356357659195737 | 10.778888487002301  | 4.667272527001794    | T | T | T |
| 21.2938008482605348 | 10.7727505665478329 | 4.6654819088880215   | T | T | T |
| 18.6188977920644234 | 0.0173753025986538  | 6.9795419501317877   | T | T | T |
| 2.6553935973992366  | 0.0132647336368995  | 6.9690314674125066   | T | T | T |
| 5.3231489933957211  | 0.0089903144310464  | 6.9838962836618617   | T | T | T |
| 7.9839243380543579  | 0.008743877520315   | 6.9964330325907689   | T | T | T |
| 10.6367728185443138 | 0.0081408913452112  | 6.9952599504021538   | T | T | T |
| 13.2961310880880834 | 0.022575497155404   | 7.0145974847060941   | T | T | T |
| 15.950959591726556  | 0.0141349457660203  | 6.9736331202384907   | T | T | T |
| 19.9490360027934130 | 2.3166838206127984  | 6.9846568989840945   | T | T | T |
| 3.986467616412610   | 2.3160337860163027  | 6.9758201481345843   | T | T | T |
| 6.6501274105763413  | 2.315729663049518   | 6.9862024146057982   | T | T | T |
| 9.3136591899758514  | 2.3208187554128307  | 7.0126291894654339   | T | T | T |
| 11.968834848646338  | 2.3291276254392801  | 6.9683225657591272   | T | T | T |
| 14.6274835708216280 | 2.3314506494759781  | 7.064687839661397    | T | T | T |
| 17.2874252188342510 | 2.3294706697344627  | 6.9409709560616966   | T | T | T |
| 21.282320852396036  | 4.6205953645194951  | 6.9870341830893894   | T | T | T |
| 5.3172460930301710  | 4.6243783522558104  | 6.9976960466309353   | T | T | T |
| 7.986880376063321   | 4.6249872544408639  | 6.9864199286786350   | T | T | T |
| 10.6569654726483851 | 4.6218300997531816  | 6.9871354274579707   | T | T | T |
| 15.9405479267399990 | 4.6465423062867266  | 6.964966715054512    | T | T | T |
| 18.620472764502624  | 4.6276558963798138  | 6.9707294415957808   | T | T | T |
| 3.989454952624607   | 6.9290965609397928  | 6.9783964309758995   | T | T | T |
| 6.6531906506680885  | 6.921905045484851   | 6.9992353154600577   | T | T | T |
| 9.317342202191961   | 6.9274367587615142  | 6.9783885441787668   | T | T | T |
| 11.9893376002788443 | 6.9301949539049641  | 6.9863498497778984   | T | T | T |
| 14.6317650852875385 | 6.9140394615436449  | 6.9498311634387655   | T | T | T |
| 17.262431238761921  | 6.9236821485091467  | 7.005319394378389    | T | T | T |
| 19.9433907132448098 | 6.9300947810299718  | 6.9806785490927599   | T | T | T |
| 23.945588965742650  | 9.2342064946496372  | 6.9922748889900443   | T | T | T |
| 7.9794305338963092  | 9.2316423272795607  | 6.9843658908749058   | T | T | T |
| 10.646280892708584  | 9.2297414634681338  | 7.0160942866071494   | T | T | T |
| 13.3094609240722441 | 9.2198893846017231  | 6.9865861821898365   | T | T | T |
| 15.9504470480696554 | 9.212355758536540   | 6.9842977321918074   | T | T | T |
| 18.6214576358871824 | 9.2313029253837176  | 6.9791749544012182   | T | T | T |
| 21.2821171795425883 | 9.2316516087025295  | 6.9756707176466479   | T | T | T |
| 13.3183719897250121 | 4.6513664567025161  | 6.9751497558898444   | T | T | T |
| 9.7578761619194623  | 5.021226810098915   | 10.1112550529865324  | T | T | T |
| 11.1316814978502485 | 4.7854650988551919  | 0.0860042748106711   | T | T | T |
| 11.6265997804445860 | 3.462630582709682   | 12.166843889421843   | T | T | T |
| 10.7100692892643945 | 2.3896744981150153  | 10.1541420246963821  | T | T | T |
| 9.3379420805346562  | 2.6363516685133579  | 10.1759387024402503  | T | T | T |
| 8.8574690286099269  | 3.9507042703324649  | 10.1628091828111273  | T | T | T |
| 14.2377454332326332 | 3.055783089842254   | 10.2765850864659090  | T | T | T |
| 13.0262699019818360 | 3.2288206694712551  | 10.1761797574975876  | T | T | T |
| 16.6425485272000557 | 1.2129457091607618  | 10.4952912644513869  | T | T | T |
| 15.7108863054399421 | 3.0029821295325815  | 12.8210132988105521  | T | T | T |
| 17.0328055446186575 | 4.2806518632970231  | 10.36962505540007783 | T | T | T |
| 9.3886099968398824  | 6.0467842134646395  | 10.0796767750294016  | T | T | T |
| 11.8420831774191060 | 5.6140459291268484  | 10.0439653521221764  | T | T | T |
| 11.087171253496212  | 1.3668494380389847  | 10.1662214021119635  | T | T | T |
| 8.640555806897443   | 1.7979659034079931  | 10.1988715352149306  | T | T | T |
| 7.7830519597010426  | 4.1404827034219336  | 10.1797615207928800  | T | T | T |
| 15.9862937466307429 | 0.3993112051206210  | 10.8332142172879244  | T | T | T |
| 17.6371489737654343 | 1.0747208988692771  | 10.9445964259118362  | T | T | T |
| 16.754269424068692  | 1.1204708312153702  | 9.403390659175830    | T | T | T |
| 15.0407850883139975 | 2.069758924616607   | 13.1791434146829971  | T | T | T |
| 15.2735788799448642 | 3.9741255173095431  | 13.0912071173360847  | T | T | T |
| 16.6813672102693360 | 2.9013502542484556  | 13.329034198983872   | T | T | T |
| 17.9291883718103371 | 4.3500536610763236  | 11.0028269432363608  | T | T | T |
| 16.4951723843102052 | 5.2465383631234715  | 10.3919427510748417  | T | T | T |
| 17.367743986642028  | 4.1185750771925358  | 9.333603516996817    | T | T | T |
| 14.439592287017185  | 7.1308515744808227  | 9.9450129661479355   | T | T | T |
| 15.9426343149713432 | 2.8868415694598784  | 10.9604471265958043  | T | T | T |

### POSCAR for INT2 ###

Zn C H Cl Si

|                     |                     |                     |                    |  |  |
|---------------------|---------------------|---------------------|--------------------|--|--|
| 1.0000000000000000  |                     |                     |                    |  |  |
| 18.6331263453300018 | 0.0000000000000000  | 0.0000000000000000  | 0.0000000000000000 |  |  |
| 6.6546879804749999  | 11.5262576907006249 | 0.0000000000000000  | 0.0000000000000000 |  |  |
| 0.0000000000000000  | 0.0000000000000000  | 24.5455240212800021 |                    |  |  |

140 19 1 1

Selective dynamics

Cartesian

|                      |                     |                    |   |   |   |
|----------------------|---------------------|--------------------|---|---|---|
| 18.6331263453299378  | 1.5368343587600781  | 0.0000000000000000 | F | F | F |
| 2.6618751921899908   | 1.5368343587600781  | 0.0000000000000000 | F | F | F |
| 5.3237503843800473   | 1.5368343587600781  | 0.0000000000000000 | F | F | F |
| 7.9856255765699720   | 1.5368343587600781  | 0.0000000000000000 | F | F | F |
| 10.6475007687600289  | 1.5368343587600781  | 0.0000000000000000 | F | F | F |
| 13.3093759609499536  | 1.5368343587600781  | 0.0000000000000000 | F | F | F |
| 15.9712511531400014  | 1.5368343587600781  | 0.0000000000000000 | F | F | F |
| 19.9640639414249534  | 3.8420858969002354  | 0.0000000000000000 | F | F | F |
| 3.9928127882850095   | 3.8420858969002354  | 0.0000000000000000 | F | F | F |
| 6.6546879804750656   | 3.8420858969002354  | 0.0000000000000000 | F | F | F |
| 9.3165631726649902   | 3.8420858969002354  | 0.0000000000000000 | F | F | F |
| 11.978438364850481   | 3.8420858969002354  | 0.0000000000000000 | F | F | F |
| 14.6403135704497727  | 3.8420858969002354  | 0.0000000000000000 | F | F | F |
| 17.30218874292350288 | 3.8420858969002354  | 0.0000000000000000 | F | F | F |
| 21.2950015375199264  | 6.1473734350403116  | 0.0000000000000000 | F | F | F |
| 5.3237503843799807   | 6.1473734350403116  | 0.0000000000000000 | F | F | F |
| 7.9856255765700377   | 6.1473734350403116  | 0.0000000000000000 | F | F | F |
| 10.6475007687599614  | 6.1473734350403116  | 0.0000000000000000 | F | F | F |
| 13.3093759609500193  | 6.1473734350403116  | 0.0000000000000000 | F | F | F |
| 15.9712511531399439  | 6.1473734350403116  | 0.0000000000000000 | F | F | F |
| 18.6331263453300018  | 6.1473734350403116  | 0.0000000000000000 | F | F | F |
| 22.6259391336149456  | 4.452588971804700   | 0.0000000000000000 | F | F | F |
| 6.6546879804749999   | 4.452588971804700   | 0.0000000000000000 | F | F | F |
| 9.3165631726650560   | 4.452588971804700   | 0.0000000000000000 | F | F | F |
| 11.9784383648549806  | 4.452588971804700   | 0.0000000000000000 | F | F | F |
| 14.6403135704503385  | 4.452588971804700   | 0.0000000000000000 | F | F | F |
| 17.30218874292349649 | 4.452588971804700   | 0.0000000000000000 | F | F | F |
| 19.9640639414250209  | 4.452588971804700   | 0.0000000000000000 | F | F | F |
| 23.9568767297093185  | 10.7578405113205449 | 0.0000000000000000 | F | F | F |
| 7.9856255765699711   | 10.7578405113205449 | 0.0000000000000000 | F | F | F |
| 10.6475007687600289  | 10.7578405113205449 | 0.0000000000000000 | F | F | F |
| 13.3093759609499536  | 10.7578405113205449 | 0.0000000000000000 | F | F | F |
| 15.9712511531400096  | 10.7578405113205449 | 0.0000000000000000 | F | F | F |
| 18.6331263453299343  | 10.7578405113205449 | 0.0000000000000000 | F | F | F |
| 21.2950015375199939  | 10.7578405113205449 | 0.0000000000000000 | F | F | F |
| 0.0000000000000000   | 0.0000000000000000  | 2.386318053199650  | F | F | F |
| 2.6618751921900570   | 0.0000000000000000  | 2.386318053199650  | F | F | F |

|                      |                    |                   |   |   |   |
|----------------------|--------------------|-------------------|---|---|---|
| 5.3237503843799816   | 0.0000000000000000 | 2.386318053199650 | F | F | F |
| 7.9856255765700386   | 0.0000000000000000 | 2.386318053199650 | F | F | F |
| 10.6475007687599632  | 0.0000000000000000 | 2.386318053199650 | F | F | F |
| 13.3093759609500211  | 0.0000000000000000 | 2.386318053199650 | F | F | F |
| 15.9712511531399439  | 0.0000000000000000 | 2.386318053199650 | F | F | F |
| 1.3309375960950185   | 2.3052515381401570 | 2.386318053199650 | F | F | F |
| 3.9928127882850752   | 2.3052515381401570 | 2.386318053199650 | F | F | F |
| 6.6546879804749999   | 2.3052515381401570 | 2.386318053199650 | F | F | F |
| 9.3165631726650577   | 2.3052515381401570 | 2.386318053199650 | F | F | F |
| 11.9784383648549824  | 2.3052515381401570 | 2.386318053199650 | F | F | F |
| 14.640313570450402   | 2.3052515381401570 | 2.386318053199650 | F | F | F |
| 17.30218874292349613 | 2.3052515381401570 | 2.386318053199650 | F | F | F |
| 2.6618751921899904   | 4.6105030762802333 | 2.386318053199650 | F | F | F |
| 5.3237503843800473   | 4.6105030762802333 | 2.386318053199650 | F | F | F |
| 7.9856255765699720   | 4.6105030762802333 | 2.386318053199650 | F | F | F |
| 10.6475007687600289  | 4.6105030762802333 | 2.386318053199650 | F | F | F |
| 13.3093759609499536  | 4.6105030762802333 | 2.386318053199650 | F | F | F |
| 15.9712511531400014  | 4.6105030762802333 | 2.386318053199650 | F | F | F |
| 18.6331263453299343  | 4.6105030762802333 | 2.386318053199650 | F | F | F |
| 3.9928127882850095   | 6.9157546144203916 | 2.386318053199650 | F | F | F |
| 6.6546879804750656   | 6.9157546144203916 | 2.386318053199650 | F | F | F |
| 9.3165631726649920   | 6.9157546144203916 | 2.386318053199650 | F | F | F |
| 11.978438364850481   | 6.9157546144203916 | 2.386318053199650 | F | F | F |
| 14.6403135704497277  | 6.9157546144203916 | 2.386318053199650 | F | F | F |
| 17.30218874292350288 | 6.9157546144203916 | 2.386318053199650 | F | F | F |
| 19.9640639414249534  | 6.9157546144203916 | 2.386318053199650 | F | F | F |
| 5.3237503843799807   | 9.2210061525604665 | 2.386318053199650 | F | F | F |
| 7.9856255765700377   | 9.2210061525604665 | 2.386318053199650 | F | F | F |
| 10.6475007687599614  | 9.2210061525604665 | 2.386318053199650 | F | F | F |
| 13.3093759609500193  | 9.2210061525604665 |                   |   |   |   |

|                            |                     |                      |   |   |   |                     |                     |                     |   |   |   |
|----------------------------|---------------------|----------------------|---|---|---|---------------------|---------------------|---------------------|---|---|---|
| 11.0794475316642060        | 3.3255726901596723  | 9.3376250880295224   | T | T | T | 18.6331263453300018 | 9.2210061525604665  | 2.3863810053199650  | F | F | F |
| 12.2190206895351814        | 8.9838642359872836  | 10.3245031057095993  | T | T | T | 21.2950015375199229 | 9.2210061525604665  | 2.3863810053199650  | F | F | F |
| 17.0638242662513058        | 8.2185123275180043  | 10.1901575252686030  | T | T | T | 18.6582074105635130 | 1.5441383775583029  | 4.66099767263032    | T | T | T |
| 17.1434015570639318        | 6.8094785536601234  | 10.0845741452053712  | T | T | T | 2.6669405408048132  | 1.5524221518133099  | 4.67392986098687    | T | T | T |
| 18.4174551894013021        | 6.1995227567577773  | 10.1343246954632263  | T | T | T | 5.2996676537881173  | 1.5540778829266413  | 4.667159210583197   | T | T | T |
| 19.5683017334208209        | 6.9768975472579235  | 10.2597673574752264  | T | T | T | 7.934111288263094   | 1.5486245761069735  | 4.640730227381315   | T | T | T |
| 19.4761478884671035        | 8.370092980249980   | 10.3496418617758209  | T | T | T | 10.6456598012546415 | 1.5496592581467219  | 4.6603726893489558  | T | T | T |
| 14.9714747480345345        | 5.437276848520613   | 9.4235533605858848   | T | T | T | 13.3540256326592637 | 1.5535160648810198  | 4.690153441821997   | T | T | T |
| 15.9794674517059399        | 6.051362956293110   | 9.8090583390334700   | T | T | T | 16.0047553878597348 | 1.5370011713911393  | 4.659012935367784   | T | T | T |
| 12.9786392045577070        | 8.396713266251084   | 10.4994444509147904  | T | T | T | 19.9745827939738874 | 3.8547499361009407  | 4.668616903136789   | T | T | T |
| 11.1074051664891993        | 8.4831176195417370  | 12.9518404454798954  | T | T | T | 3.9932307252291532  | 3.8592211095526881  | 4.672009681587710   | T | T | T |
| 10.1456927559105097        | 7.0984347458301755  | 10.3614401040873414  | T | T | T | 6.6524280884408507  | 3.8532533047096131  | 4.675590654611013   | T | T | T |
| 15.4788055501747586        | 11.0454704711370866 | 10.5761674300507895  | T | T | T | 9.3159227201117538  | 3.8535262642583090  | 4.6409812833104818  | T | T | T |
| 10.9149220519721624        | 0.7360196724965455  | 9.9572737171244946   | T | T | T | 11.9977469632709939 | 3.8589599162432875  | 4.7034326582543793  | T | T | T |
| 8.7210954933441958         | 4.4534233184749157  | 9.8871045103742574   | T | T | T | 14.6229230021891166 | 3.8585835222713479  | 4.6950467239739030  | T | T | T |
| 6.632330834931974          | 3.2356076350792780  | 10.4806064295067891  | T | T | T | 17.3053497053545478 | 3.8469370530166049  | 4.6595188355418005  | T | T | T |
| 6.682349221307510          | 0.7654294120665068  | 10.8033678996185998  | T | T | T | 21.3032132021794602 | 3.61648066368379366 | 4.6701401527822517  | T | T | T |
| 18.1443447870180563        | 10.0697709966249231 | 10.3930046798989368  | T | T | T | 5.3281553457186579  | 3.61605141569850037 | 4.6745046963532273  | T | T | T |
| 16.08196065210628614       | 6.6910718105515674  | 10.1414869077879395  | T | T | T | 7.9943822211721143  | 3.61605198708742819 | 4.67829024965146680 | T | T | T |
| 18.4898653610628614        | 5.1148959897257477  | 10.0477084220198486  | T | T | T | 10.6677682040925532 | 3.61522829280718400 | 4.675856325183269   | T | T | T |
| 20.5458312826937295        | 6.4920777349500263  | 10.2736354004610199  | T | T | T | 13.3108547808426273 | 3.61020460388559981 | 4.751877422428211   | T | T | T |
| 20.3789412668727508        | 8.9759552878459754  | 10.4289309981774974  | T | T | T | 15.983701636388970  | 3.61474149197130119 | 4.6551498779902412  | T | T | T |
| 13.7959431006566220        | 8.6715836326492575  | 11.1814084826520398  | T | T | T | 18.6545812191757552 | 3.61632754843104536 | 4.641337219147849   | T | T | T |
| 12.5876117958594129        | 9.3149943964953543  | 10.0323207669352925  | T | T | T | 22.6394168912048315 | 3.4622054933905186  | 4.6791878820128989  | T | T | T |
| 13.3924200057058904        | 7.7540834347501919  | 7.7091681338007287   | T | T | T | 6.6671932548965795  | 3.4613694677429429  | 4.666607795730408   | T | T | T |
| 11.9728260399728939        | 8.653188857408630   | 13.6078351706159832  | T | T | T | 9.3346210089515438  | 3.4595149583952261  | 4.677027892294773   | T | T | T |
| 10.3401838507385206        | 7.9361967738924477  | 13.5170515051535727  | T | T | T | 11.9859848301066503 | 3.4774688501651809  | 4.647849843244864   | T | T | T |
| 10.694594350441688         | 9.4609412758548044  | 12.6606756282577748  | T | T | T | 14.6222524374215475 | 3.4733465786547146  | 4.658830886953785   | T | T | T |
| 9.7317371184605044         | 8.0033975901228533  | 9.8896851392754748   | T | T | T | 17.3115440266170495 | 3.4626248729691635  | 4.6618645854021343  | T | T | T |
| 9.3549972305206488         | 6.6223731857788515  | 10.95808851217183087 | T | T | T | 19.9778873095243199 | 3.4657804578061171  | 4.6738981149926149  | T | T | T |
| 10.4428857314915700        | 6.4064454321865988  | 9.5587898208956474   | T | T | T | 23.9720188665432019 | 3.4626248729691635  | 4.6782627495796257  | T | T | T |
| 12.3833527530177214        | 5.6889782449415085  | 12.1114578904281700  | T | T | T | 7.9982935010914566  | 3.7655742656232878  | 4.683518054068846   | T | T | T |
| 11.6131145246756695        | 7.5291190028126108  | 11.4312647367033495  | T | T | T | 10.6468319424554885 | 3.763913464821943   | 4.6769919266437009  | T | T | T |
| ### POSCAR for INT3-24 ### |                     |                      |   |   |   | 13.2979023232387945 | 3.7845415059295089  | 4.6631196218439088  | T | T | T |
| Zn C H Cl Si               |                     |                      |   |   |   | 15.9725768404836810 | 3.767299057685850   | 4.6703110723479062  | T | T | T |
| 1.0000000000000000         |                     |                      |   |   |   | 18.6477095243477962 | 3.7754050505952002  | 4.6602827147878649  | T | T | T |
| 18.6331263453300018        | 0.0000000000000000  | 0.0000000000000000   |   |   |   | 21.3107486169998275 | 3.7682738915637177  | 4.6815494263638482  | T | T | T |
| 6.6546879804749999         | 11.526257697006249  | 0.0000000000000000   |   |   |   | 18.6398199471727288 | 3.0052766521238537  | 6.9989060290057301  | T | T | T |
| 0.0000000000000000         | 0.0000000000000000  | 24.545524021280021   |   |   |   | 2.6637761459903677  | 3.0177917364503341  | 4.0189067929813636  | T | T | T |
| 5.3096423429027260         | 0.0236528638503508  |                      |   |   |   | 5.3096423429027260  | 0.0236528638503508  | 7.0022367086177892  | T | T | T |
| 7.9617991314066243         | 0.0025337270984548  |                      |   |   |   | 17.2702172457638845 | 11.5043724549607074 | 7.0134308284173921  | T | T | T |
| 19.9868823053718110        | 11.4858034405609981 |                      |   |   |   | 19.9868823053718110 | 11.4858034405609981 | 9.580295184504308   | T | T | T |
| 15.9780546976065327        | 0.0123355291164431  |                      |   |   |   | 15.9780546976065327 | 0.0123355291164431  | 7.0154833783364996  | T | T | T |
| 19.9584296164361206        | 2.3197245964016511  |                      |   |   |   | 19.9584296164361206 | 2.3197245964016511  | 7.015231202724448   | T | T | T |
| 3.9770277211151324         | 2.3249588531525847  |                      |   |   |   | 3.9770277211151324  | 2.3249588531525847  | 7.038102562397932   | T | T | T |
| 6.6217143053252396         | 2.3070956382451615  |                      |   |   |   | 6.6217143053252396  | 2.3070956382451615  | 7.019571037193657   | T | T | T |
| 9.2420665575123540         | 2.28926652570888239 |                      |   |   |   | 9.2420665575123540  | 2.28926652570888239 | 6.8418983052682054  | T | T | T |
| 12.0086919843162452        | 2.1693292299905114  |                      |   |   |   | 12.0086919843162452 | 2.1693292299905114  | 7.0191073274859788  | T | T | T |
| 14.6760439394223194        | 2.3430115614817866  |                      |   |   |   | 14.6760439394223194 | 2.3430115614817866  | 6.959299053772863   | T | T | T |
| 17.3208378814586617        | 2.3048271232587503  |                      |   |   |   | 17.3208378814586617 | 2.3048271232587503  | 9.580295184504308   | T | T | T |
| 21.2802596802514650        | 4.6195121226795068  |                      |   |   |   | 21.2802596802514650 | 4.6195121226795068  | 7.0137203264149975  | T | T | T |
| 5.2973607737731108         | 4.6243529934571663  |                      |   |   |   | 5.2973607737731108  | 4.6243529934571663  | 7.0138078351352773  | T | T | T |
| 7.9438381931627724         | 4.6220760191470518  |                      |   |   |   | 7.9438381931627724  | 4.6220760191470518  | 6.9769552782762267  | T | T | T |
| 10.531683945687639         | 4.7046363091497385  |                      |   |   |   | 10.531683945687639  | 4.7046363091497385  | 6.9685645680092063  | T | T | T |
| 15.9256967122917025        | 4.6158018787748585  |                      |   |   |   | 15.9256967122917025 | 4.6158018787748585  | 6.9450395712985058  | T | T | T |
| 18.6187134542033661        | 4.6341952930913761  |                      |   |   |   | 18.6187134542033661 | 4.6341952930913761  | 6.970274683638589   | T | T | T |
| 22.6164490316256952        | 6.9264071436776895  |                      |   |   |   | 22.6164490316256952 | 6.9264071436776895  | 7.0003158892612523  | T | T | T |
| 6.6471465910414733         | 6.9272152901131170  |                      |   |   |   | 6.6471465910414733  | 6.9272152901131170  | 7.0040127154769921  | T | T | T |
| 9.0983845081710079         | 6.9632466245860059  |                      |   |   |   | 9.0983845081710079  | 6.9632466245860059  | 7.0266680132123130  | T | T | T |
| 11.9896230377822258        | 6.9651524602155409  |                      |   |   |   | 11.9896230377822258 | 6.9651524602155409  | 6.9295812370204804  | T | T | T |
| 14.6551754002284151        | 6.990427846627807   |                      |   |   |   | 14.6551754002284151 | 6.990427846627807   | 6.9511606475719182  | T | T | T |
| 17.3069891494496616        | 6.929122944587076   |                      |   |   |   | 17.3069891494496616 | 6.929122944587076   | 6.9310811984776572  | T | T | T |
| 19.9632133948696762        | 6.9196062442783752  |                      |   |   |   | 19.9632133948696762 | 6.9196062442783752  | 7.0219356571504505  | T | T | T |
| 23.9546224739784961        | 9.2267257195208607  |                      |   |   |   | 23.9546224739784961 | 9.2267257195208607  | 7.0102380365088686  | T | T | T |
| 7.9802631318525830         | 2.400998511794623   |                      |   |   |   | 7.9802631318525830  | 2.400998511794623   | 7.004918415376167   | T | T | T |
| 10.6472880781571408        | 9.245853537830129   |                      |   |   |   | 10.6472880781571408 | 9.245853537830129   | 6.998618655177253   | T | T | T |
| 13.3009289662006296        | 2.677909423752407   |                      |   |   |   | 13.3009289662006296 | 2.677909423752407   | 6.962987773824137   | T | T | T |
| 15.964849473737402         | 9.2395137582195996  |                      |   |   |   | 15.964849473737402  | 9.2395137582195996  | 6.988445665751598   | T | T | T |
| 18.6265750888704424        | 9.2163435747268618  |                      |   |   |   | 18.6265750888704424 | 9.2163435747268618  | 6.996658887398150   | T | T | T |
| 21.3000131168362294        | 9.2086567235875574  |                      |   |   |   | 21.3000131168362294 | 9.2086567235875574  | 6.9941270224377901  | T | T | T |
| 13.6533992066594063        | 4.9967211394128439  |                      |   |   |   | 13.6533992066594063 | 4.9967211394128439  | 7.113932728091585   | T | T | T |
| 9.0310929151371244         | 0.5477758166019372  |                      |   |   |   | 9.0310929151371244  | 0.5477758166019372  | 10.457945945768624  | T | T | T |
| 10.1859485574345516        | 2.137137969332492   |                      |   |   |   | 10.1859485574345516 | 2.137137969332492   | 10.0892862942840686 | T | T | T |
| 10.1381343044800073        | 2.6273145326380303  |                      |   |   |   | 10.1381343044800073 | 2.6273145326380303  | 9.8662239628116613  | T | T | T |
| 8.9209299298799143         | 3.197070832513140   |                      |   |   |   | 8.9209299298799143  | 3.197070832513140   | 10.056120030639642  | T | T | T |
| 7.7726505518047269         | 2.6203922938235129  |                      |   |   |   | 7.7726505518047269  | 2.6203922938235129  | 10.4244925863278155 | T | T | T |
| 7.8209103918071010         | 1.2344392992556039  |                      |   |   |   | 7.820910391         |                     |                     |   |   |   |



|                     |                     |                     |   |   |   |                            |                     |                     |   |   |   |
|---------------------|---------------------|---------------------|---|---|---|----------------------------|---------------------|---------------------|---|---|---|
| 18.6331263453300018 | 6.1473374350403116  | 0.0000000000000000  | F | F | F | 17.3246243390996955        | 6.9757012705460744  | 7.032816109973334   | T | T | T |
| 12.6259391336149456 | 8.452588971804700   | 0.0000000000000000  | F | F | F | 19.9722459786525981        | 6.9190321560250343  | 6.9942580216906531  | T | T | T |
| 6.6546879804749999  | 8.452588971804700   | 0.0000000000000000  | F | F | F | 5.3388823593515706         | 9.2025480373817690  | 6.976645896405979   | T | T | T |
| 9.3165631726650560  | 8.452588971804700   | 0.0000000000000000  | F | F | F | 7.9952876711891465         | 9.2073494669122839  | 6.986138541305701   | T | T | T |
| 11.9784383645849806 | 8.452588971804700   | 0.0000000000000000  | F | F | F | 10.6387780413905730        | 9.2316006442781351  | 6.9896154326668732  | T | T | T |
| 14.6403135750450385 | 8.452588971804700   | 0.0000000000000000  | F | F | F | 13.2978292199118755        | 9.2551188286289570  | 6.9584993689899360  | T | T | T |
| 17.3021887492349649 | 8.452588971804700   | 0.0000000000000000  | F | F | F | 15.9582952122984238        | 9.2532129731794300  | 6.9460683692644682  | T | T | T |
| 19.9640639414250209 | 8.452588971804700   | 0.0000000000000000  | F | F | F | 18.6274328140107883        | 9.2249784939496031  | 7.009192875783757   | T | T | T |
| 23.9568767297099185 | 10.7578405113205449 | 0.0000000000000000  | F | F | F | 21.3008601638036055        | 9.2118877275809948  | 6.9873782745157973  | T | T | T |
| 7.9856255765699711  | 10.7578405113205449 | 0.0000000000000000  | F | F | F | 13.13036424221209048       | 4.7209886388425364  | 6.8436821338172553  | T | T | T |
| 10.6475007687600289 | 10.7578405113205449 | 0.0000000000000000  | F | F | F | 10.8462960822770818        | 2.2464016496923485  | 10.5910414246343514 | T | T | T |
| 13.3093759609499536 | 10.7578405113205449 | 0.0000000000000000  | F | F | F | 12.1615644610376730        | 2.3711555760168421  | 10.1488571687441414 | T | T | T |
| 15.9712511531400096 | 10.7578405113205449 | 0.0000000000000000  | F | F | F | 12.6928655341785745        | 3.6541440856733618  | 9.8960868503124040  | T | T | T |
| 18.6331263453299343 | 10.7578405113205449 | 0.0000000000000000  | F | F | F | 11.9038281807103719        | 4.800445417963615   | 10.1470051301508146 | T | T | T |
| 21.2950015375199939 | 10.7578405113205449 | 0.0000000000000000  | F | F | F | 10.59307196755232104       | 4.6582418975391171  | 10.5862990265816617 | T | T | T |
| 0.0000000000000000  | 0.0000000000000000  | 0.0000000000000000  | F | F | F | 10.0551083011344105        | 3.809611722394610   | 10.7926482117853944 | T | T | T |
| 2.6618715921900570  | 0.0000000000000000  | 2.3863810053199650  | F | F | F | 14.7193396118745294        | 3.9264073747282340  | 8.218975531130294   | T | T | T |
| 5.3237503843790816  | 0.0000000000000000  | 2.3863810053199650  | F | F | F | 13.8775007287341534        | 3.7975724367269534  | 9.1395627239229782  | T | T | T |
| 7.9856255765790386  | 0.0000000000000000  | 2.3863810053199650  | F | F | F | 13.845167397594716         | 6.5383423356425645  | 10.650004263496670  | T | T | T |
| 10.6475007687599532 | 0.0000000000000000  | 2.3863810053199650  | F | F | F | 16.7142064008043576        | 9.718152559430082   | 10.6502905226126760 | T | T | T |
| 13.3093759609500111 | 0.0000000000000000  | 2.3863810053199650  | F | F | F | 15.7888156077816174        | 7.9858064961733901  | 13.0011451310556359 | T | T | T |
| 15.9712511531399430 | 0.0000000000000000  | 2.3863810053199650  | F | F | F | 10.4265078921118468        | 1.252772039759238   | 10.7520995127171348 | T | T | T |
| 1.3309375960950185  | 2.3052515381401570  | 2.3863810053199650  | F | F | F | 12.7708382776572194        | 1.4889529257026857  | 9.95372644473266    | T | T | T |
| 3.9928127882850752  | 2.3052515381401570  | 2.3863810053199650  | F | F | F | 12.3173353058189612        | 5.7876673044599229  | 9.938198062150498   | T | T | T |
| 6.6546879804749999  | 2.3052515381401570  | 2.3863810053199650  | F | F | F | 9.9784816078132899         | 5.5446918911109231  | 10.742862572924788  | T | T | T |
| 9.3165631726650577  | 2.3052515381401570  | 2.3863810053199650  | F | F | F | 9.0167711011896419         | 3.2733881978369683  | 11.1068093908331799 | T | T | T |
| 11.9784383648549824 | 2.3052515381401570  | 2.3863810053199650  | F | F | F | 13.7618843021027857        | 8.5541987554485797  | 9.514385156694228   | T | T | T |
| 14.6403135750450402 | 2.3052515381401570  | 2.3863810053199650  | F | F | F | 13.4577964047383465        | 9.4933070449149035  | 11.0346470269418564 | T | T | T |
| 17.3021887492349613 | 2.3052515381401570  | 2.3863810053199650  | F | F | F | 13.2118986865488353        | 7.7266176037277017  | 11.033221052899574  | T | T | T |
| 2.6618715921899044  | 4.6105030762802333  | 2.3863810053199650  | F | F | F | 16.5748891505067739        | 9.9171265879672195  | 9.530236018722586   | T | T | T |
| 5.3237503843800473  | 4.6105030762802333  | 2.3863810053199650  | F | F | F | 17.7766885727292838        | 9.4841076054000002  | 10.7726098712584758 | T | T | T |
| 7.9856255765699720  | 4.6105030762802333  | 2.3863810053199650  | F | F | F | 16.454515784486125         | 10.6217140337425917 | 11.163017917127576  | T | T | T |
| 10.6475007687600289 | 4.6105030762802333  | 2.3863810053199650  | F | F | F | 15.4447332406356228        | 8.8634159038812843  | 13.5686209823013997 | T | T | T |
| 13.3093759609499536 | 4.6105030762802333  | 2.3863810053199650  | F | F | F | 16.8361553050204762        | 7.7885579285013939  | 13.2668821583053780 | T | T | T |
| 15.9712511531400114 | 4.6105030762802333  | 2.3863810053199650  | F | F | F | 15.1822266724039210        | 7.1193760063385758  | 13.2989013584226345 | T | T | T |
| 18.6331263453299343 | 4.6105030762802333  | 2.3863810053199650  | F | F | F | 17.36978013260192747       | 2.1451258378716442  | 9.8347337059219289  | T | T | T |
| 3.9928127882850095  | 6.9157546144203916  | 2.3863810053199650  | F | F | F | 16.3125306561598800        | 6.5566216384724818  | 10.218656173417436  | T | T | T |
| 6.6546879804750665  | 6.9157546144203916  | 2.3863810053199650  | F | F | F | 15.6215677881399628        | 8.3086914062051580  | 11.1733824660978059 | T | T | T |
| 9.3165631726649920  | 6.9157546144203916  | 2.3863810053199650  | F | F | F | ### POSCAR for TS25-26 ### |                     |                     |   |   |   |
| 11.9784383648550481 | 6.9157546144203916  | 2.3863810053199650  | F | F | F | Zn C H Cl Si               |                     |                     |   |   |   |
| 14.6403135750449727 | 6.9157546144203916  | 2.3863810053199650  | F | F | F | 1.0000000000000000         |                     |                     |   |   |   |
| 17.3021887492350288 | 6.9157546144203916  | 2.3863810053199650  | F | F | F | 18.6331263453299982        | 0.0000000000000000  | 0.0000000000000000  | F | F | F |
| 19.9640639414249534 | 6.9157546144203916  | 2.3863810053199650  | F | F | F | 6.6546879804749999         | 11.5262576907006000 | 0.0000000000000000  | F | F | F |
| 5.3237503843798007  | 9.2210061525604665  | 2.3863810053199650  | F | F | F | 0.0000000000000000         |                     |                     |   |   |   |
| 7.9856255765700377  | 9.2210061525604665  | 2.3863810053199650  | F | F | F | 140 11 14 2 1              |                     |                     |   |   |   |
| 10.6475007687599614 | 9.2210061525604665  | 2.3863810053199650  | F | F | F | Selective dynamics         |                     |                     |   |   |   |
| 13.3093759609500193 | 9.2210061525604665  | 2.3863810053199650  | F | F | F | Cartesian                  |                     |                     |   |   |   |
| 15.9712511531399439 | 9.2210061525604665  | 2.3863810053199650  | F | F | F | 18.6331263453299343        | 1.5368343587600748  | 0.0000000000000000  | F | F | F |
| 18.6331263453300018 | 9.2210061525604665  | 2.3863810053199650  | F | F | F | 2.6618715921899890         | 1.5368343587600748  | 0.0000000000000000  | F | F | F |
| 21.2950015375199229 | 9.2210061525604665  | 2.3863810053199650  | F | F | F | 5.3237503843800447         | 1.5368343587600748  | 0.0000000000000000  | F | F | F |
| 18.6463280365353304 | 1.5420485391749164  | 4.6815288533023818  | T | T | T | 7.9856255765699711         | 1.5368343587600748  | 0.0000000000000000  | F | F | F |
| 2.6800802279040870  | 1.5386163423239006  | 6.65417440835814308 | T | T | T | 10.6475007687600272        | 1.5368343587600748  | 0.0000000000000000  | F | F | F |
| 5.3254555678254762  | 1.5552816329689279  | 4.670446034932194   | T | T | T | 13.3093759609499518        | 1.5368343587600748  | 0.0000000000000000  | F | F | F |
| 7.9681936936843085  | 1.5528923173841203  | 4.6618096720761750  | T | T | T | 15.9712511531400079        | 1.5368343587600748  | 0.0000000000000000  | F | F | F |
| 10.6088018284182795 | 1.5442623203095972  | 4.6458304496679839  | T | T | T | 19.9640639414249428        | 3.8420858969022305  | 0.0000000000000000  | F | F | F |
| 13.3139959483356627 | 1.5507660918775057  | 4.6674292120709699  | T | T | T | 3.9928127882847373         | 3.8420858969022305  | 0.0000000000000000  | F | F | F |
| 16.0324873280363782 | 1.5576298717992343  | 4.7461421857015731  | T | T | T | 6.6546879804750603         | 3.8420858969022305  | 0.0000000000000000  | F | F | F |
| 19.9624986424377013 | 3.8420658497291322  | 4.6692785289143970  | T | T | T | 9.3165631726649867         | 3.8420858969022305  | 0.0000000000000000  | F | F | F |
| 3.9993772992639025  | 8.8546271183406187  | 4.6617930416880222  | T | T | T | 11.9784383648550428        | 3.8420858969022305  | 0.0000000000000000  | F | F | F |
| 6.6565341341317676  | 8.857385302620212   | 4.6716916027702631  | T | T | T | 14.6403135750449709        | 3.8420858969022305  | 0.0000000000000000  | F | F | F |
| 9.3097744767164844  | 3.8595180072943812  | 4.6819371009777328  | T | T | T | 17.3021887492350182        | 3.8420858969022305  | 0.0000000000000000  | F | F | F |
| 11.9644015980595260 | 3.8349308506985091  | 4.6276709030717471  | T | T | T | 21.2950015375199887        | 6.1473374350403116  | 0.0000000000000000  | F | F | F |
| 14.6611295076369892 | 3.8362802774330875  | 4.6680776541092124  | T | T | T | 5.3237503843799763         | 6.1473374350403116  | 0.0000000000000000  | F | F | F |
| 17.3079363602251703 | 3.8056919671762666  | 4.767129010932922   | T | T | T | 7.9856255765700288         | 6.1473374350403116  | 0.0000000000000000  | F | F | F |
| 21.3025115602008911 | 6.1593340771066032  | 4.6484542878198090  | T | T | T | 10.6475007687599561        | 6.1473374350403116  | 0.0000000000000000  | F | F | F |
| 5.3290634293058119  | 6.1569749116073851  | 4.6669215561739890  | T | T | T | 13.3093759609500175        | 6.1473374350403116  | 0.0000000000000000  | F | F | F |
| 7.986374704888127   | 6.1543424764943300  | 4.6740708930636616  | T | T | T | 15.9712511531399421        | 6.1473374350403116  | 0.0000000000000000  | F | F | F |
| 10.644902543470228  | 6.1559888229062927  | 4.6677783570398802  | T | T | T | 18.6331263453299982        | 6.1473374350403116  | 0.0000000000000000  | F | F | F |
| 13.3201712901438469 | 6.1684246129948432  | 4.6468897897482444  | T | T | T | 22.6259391336149420        | 8.452588971804504   | 0.0000000000000000  | F | F | F |
| 15.9814020191479322 | 6.1261823713381052  | 4.7161004795829680  | T | T | T | 6.6546879804749901         | 8.452588971804504   | 0.0000000000000000  | F | F | F |
| 18.6481161129883724 | 6.1465542830315743  | 4.659355575539722   | T | T | T | 9.3165631726650524         | 8.452588971804504   | 0.0000000000000000  | F | F | F |
| 22.6352103212066282 | 4.4644768567614008  | 4.6700572076355291  | T | T | T | 11.9784383648549806        | 8.452588971804504   | 0.0000000000000000  | F | F | F |
| 6.6660596710999096  | 4.4610202988452663  | 4.6711681535394973  | T | T | T | 14.6403135750450311        | 8.452588971804504   | 0.0000000000000000  | F | F | F |
| 9.3217206984811281  | 4.4581649970640809  | 4.665606929488786   | T | T | T | 1                          |                     |                     |   |   |   |





|                     |                     |                     |   |   |   |
|---------------------|---------------------|---------------------|---|---|---|
| 9.3189370569119898  | 11.5194694560480961 | 7.0157805114829976  | T | T | T |
| 11.9845297785290867 | 11.5142471236457187 | 7.0265658981665222  | T | T | T |
| 7.9749512323006080  | 0.0118350890018299  | 7.0208529874170473  | T | T | T |
| 10.6430984987391604 | 0.0073865187250623  | 7.0112375421320037  | T | T | T |
| 19.9525251082589961 | 11.4858504397462013 | 7.0113291907918383  | T | T | T |
| 22.6242890898472240 | 11.4776350973443790 | 6.9292742995023016  | T | T | T |
| 1.3824061672697940  | 2.3061548935126734  | 7.02055870080432661 | T | T | T |
| 4.0086194525974506  | 2.3058659416892127  | 7.0227723494382035  | T | T | T |
| 6.6458196647376218  | 2.3148341416132312  | 7.0354222492509848  | T | T | T |
| 9.2900280782646441  | 2.3104334476364889  | 6.9781445952023526  | T | T | T |
| 11.9274551529604960 | 2.3217704158579369  | 6.9669314006040155  | T | T | T |
| 14.5074411341343588 | 2.259673514138137   | 6.9325984679055725  | T | T | T |
| 17.4516356614748105 | 2.2520264925236848  | 7.0014595174124210  | T | T | T |
| 2.7330179772166043  | 4.6295759677130572  | 6.9433307604784016  | T | T | T |
| 5.3526501801229145  | 4.6095946665144254  | 7.0206245543716550  | T | T | T |
| 7.9649506320296801  | 4.6005698826595856  | 7.0436900316576052  | T | T | T |
| 10.5732827340060100 | 4.6187556663362734  | 6.9736237393262597  | T | T | T |
| 16.0347806265357953 | 5.5668879672695910  | 8.6476061591100599  | T | T | T |
| 18.7614778001395166 | 4.6149975307382860  | 7.1474340495205393  | T | T | T |
| 4.0163362120095136  | 6.9068562427575015  | 6.9603774284119035  | T | T | T |
| 6.6553378534731777  | 6.9027033738987527  | 7.011168358970431   | T | T | T |
| 9.3068502587085771  | 6.9252423431764640  | 7.0322189207318131  | T | T | T |
| 11.9749330969013847 | 6.9360512156123777  | 7.0193226933997259  | T | T | T |
| 14.6253080613180875 | 6.892005762868330   | 6.987604642336499   | T | T | T |
| 17.3092735264931932 | 6.9561525166479834  | 6.89072909909292982 | T | T | T |
| 19.9872596217516403 | 6.9367522534859889  | 6.9598612348584163  | T | T | T |
| 5.3262236645137175  | 9.1973673742862374  | 6.9741087583633012  | T | T | T |
| 7.9887216284247300  | 9.2058260135291707  | 7.0214986687922011  | T | T | T |
| 10.6444360098229112 | 9.2236348162067081  | 7.0218648550695004  | T | T | T |
| 13.156616789177988  | 9.2152436942054425  | 6.9731614699313225  | T | T | T |
| 15.9587615625196815 | 9.2537657528210620  | 6.9136733173005815  | T | T | T |
| 18.6361355196359533 | 9.2145121464085248  | 7.0070201845282609  | T | T | T |
| 21.2924093348640540 | 9.201678576008164   | 7.0104693097805200  | T | T | T |
| 13.1938051835279744 | 4.6358330734604154  | 6.8671470439443567  | T | T | T |
| 11.9318060715435141 | 2.0717324500775987  | 10.4321864824868111 | T | T | T |
| 12.9897672187474225 | 2.9721509793100238  | 10.5007461804208884 | T | T | T |
| 12.7519895398666865 | 4.3559871531860290  | 10.3368923888964765 | T | T | T |
| 11.4243961171216206 | 4.8129764219381963  | 10.1464032439378489 | T | T | T |
| 10.3715673117246361 | 3.9026696906141671  | 10.128393532337977  | T | T | T |
| 10.6223426479399621 | 2.5313142209618675  | 10.2537149037293904 | T | T | T |
| 14.6794681259419484 | 6.1775288982133718  | 10.2693387985324716 | T | T | T |
| 13.7993787611690060 | 5.2975119415773628  | 10.3438018831997542 | T | T | T |
| 13.6953711612672535 | 8.9414030738016699  | 10.7343226033255821 | T | T | T |
| 16.7252317765969067 | 8.548509549233569   | 10.4805106767349852 | T | T | T |
| 15.2686274198246110 | 7.3690356769354617  | 12.9239567713544421 | T | T | T |
| 12.1289070673508892 | 1.0031356946229670  | 10.5213030444791293 | T | T | T |
| 14.0065435610653868 | 2.6173500145457633  | 10.6542078617282137 | T | T | T |
| 11.2381199601984854 | 5.8798410316594456  | 10.0258135351651170 | T | T | T |
| 9.3509915940690256  | 4.2619079584171073  | 9.9944045882084556  | T | T | T |
| 9.796908746500151   | 1.8200275939426815  | 10.2085626224907760 | T | T | T |
| 13.6278561328463006 | 9.1234875069463577  | 9.6491300893215755  | T | T | T |
| 13.8415854877211970 | 9.9126225752870027  | 11.2312957658355863 | T | T | T |
| 12.7412284033758514 | 8.5099205967165030  | 11.0682928126650264 | T | T | T |
| 16.6327921310331064 | 8.8009917850822284  | 9.4345757843123454  | T | T | T |
| 17.5681814159680023 | 7.8469334306353389  | 10.5354525013550031 | T | T | T |
| 16.9598564804696537 | 9.4342104375348033  | 11.0907202928757407 | T | T | T |
| 15.4909950680765522 | 8.2719466769378958  | 13.5120801856603379 | T | T | T |
| 16.0782759303369716 | 6.6420878991963352  | 13.0835002885447835 | T | T | T |
| 14.3297163865156847 | 6.9302733200732884  | 13.2905335641727564 | T | T | T |
| 15.8802680946709904 | 3.0863201468133514  | 8.7655757143510673  | T | T | T |
| 18.1310724025881349 | 5.3041971302210547  | 9.7101444589085688  | T | T | T |
| 15.1349499467354427 | 7.8031924686908098  | 11.108553656161025  | T | T | T |

### POSCAR for INT5 ###

Zn C H

|                     |                     |                     |
|---------------------|---------------------|---------------------|
| 1.0000000000000000  | 0.0000000000000000  | 0.0000000000000000  |
| 18.6331263453299982 | 0.0000000000000000  | 0.0000000000000000  |
| 6.6546879804749999  | 11.5262576907006000 | 0.0000000000000000  |
| 0.0000000000000000  | 0.0000000000000000  | 24.5455240212799985 |

140 16 13

Selective dynamics

Cartesian

|                     |                    |                    |   |   |   |
|---------------------|--------------------|--------------------|---|---|---|
| 18.6331263453299982 | 1.5368343587600748 | 0.0000000000000000 | F | F | F |
| 2.6618751921899890  | 1.5368343587600748 | 0.0000000000000000 | F | F | F |
| 5.3237503843800447  | 1.5368343587600748 | 0.0000000000000000 | F | F | F |
| 7.9856255765699711  | 1.5368343587600748 | 0.0000000000000000 | F | F | F |
| 10.6475007687600272 | 1.5368343587600748 | 0.0000000000000000 | F | F | F |
| 13.3093759609499518 | 1.5368343587600748 | 0.0000000000000000 | F | F | F |

### POSCAR for TS25-26 ###

Zn C H

|                     |                     |                     |
|---------------------|---------------------|---------------------|
| 1.0000000000000000  | 0.0000000000000000  | 0.0000000000000000  |
| 18.6331263453299982 | 0.0000000000000000  | 0.0000000000000000  |
| 6.6546879804749999  | 11.5262576907006000 | 0.0000000000000000  |
| 0.0000000000000000  | 0.0000000000000000  | 24.5455240212799985 |

140 16 13

Selective dynamics

Cartesian

|                     |                    |                    |   |   |   |
|---------------------|--------------------|--------------------|---|---|---|
| 18.6331263453299982 | 1.5368343587600748 | 0.0000000000000000 | F | F | F |
| 2.6618751921899890  | 1.5368343587600748 | 0.0000000000000000 | F | F | F |
| 5.3237503843800447  | 1.5368343587600748 | 0.0000000000000000 | F | F | F |
| 7.9856255765699711  | 1.5368343587600748 | 0.0000000000000000 | F | F | F |
| 10.6475007687600272 | 1.5368343587600748 | 0.0000000000000000 | F | F | F |
| 13.3093759609499518 | 1.5368343587600748 | 0.0000000000000000 | F | F | F |

### POSCAR for INT26 ###

Zn C H

|                     |                     |                     |
|---------------------|---------------------|---------------------|
| 1.0000000000000000  | 0.0000000000000000  | 0.0000000000000000  |
| 18.6331263453299982 | 0.0000000000000000  | 0.0000000000000000  |
| 6.6546879804749999  | 11.5262576907006000 | 0.0000000000000000  |
| 0.0000000000000000  | 0.0000000000000000  | 24.5455240212799985 |

140 16 13

Selective dynamics

Cartesian

|                     |                    |                    |   |   |   |
|---------------------|--------------------|--------------------|---|---|---|
| 18.6331263453299982 | 1.5368343587600748 | 0.0000000000000000 | F | F | F |
| 2.6618751921899890  | 1.5368343587600748 | 0.0000000000000000 | F | F | F |
| 5.3237503843800447  | 1.5368343587600748 | 0.0000000000000000 | F | F | F |
| 7.9856255765699711  | 1.5368343587600748 | 0.0000000000000000 | F | F | F |
| 10.6475007687600272 | 1.5368343587600748 | 0.0000000000000000 | F | F | F |
| 13.3093759609499518 | 1.5368343587600748 | 0.0000000000000000 | F | F | F |
